# Supplementary material
Source: MDPI journal article supplement (https://www.mdpi.com/2075-5309/13/7/1698)
Supplement: s1 [file s1]

# Comparing circular kitchens: a study of the Dutch housing sector

## Supplementary Material S1: Interview guide

The following material is part of the research article “Comparing circular kitchens: a study of the Dutch housing sector”.

As part of this research, semi-structured interviews were conducted. Table S1 shows the interview sample questions and how they were based on CBC generator parameter options. CBC sub-parameters that could not be transformed into a relevant question for circular kitchens are shown with a “-”.

**Table S1.** Overview of the CBC parameters and sub-parameters, and the kitchen-specific question that was iteratively derived from the parameters.

|                 | CBC Parameter                 | CBC Sub parameter                                     | Kitchen specific interview question                                                                                         | #  |
|-----------------|-------------------------------|-------------------------------------------------------|-----------------------------------------------------------------------------------------------------------------------------|----|
|                 |                               |                                                       |                                                                                                                             |    |
| Technical model | Materials/<br>resources       | technological materials                               | What materials are used for the kitchen? (biological vs. technical materials)                                               | 1  |
|                 |                               | biological materials                                  | Are there any plans to change these materials in the future? If yes which one?                                              | 2  |
|                 | Energy                        | Type of energy                                        | Can the kitchen be adapted to electric cooking at a later date? If so, how?                                                 | 3  |
|                 | System<br>architecture        | System elements                                       | What elements is the kitchen made up of?                                                                                    | 4  |
|                 |                               |                                                       | Is the kitchen wall-mounted, and if so, how?                                                                                | 5  |
|                 |                               |                                                       | Does your kitchen need a retaining wall and how much space does it take up?                                                 | 6  |
|                 |                               |                                                       | When using a retaining wall, how should it be attached to a (intermediate) wall?                                            | 7  |
|                 |                               |                                                       | Is equipment supplied with the kitchen? If so, which one and is it also circular? (in the case of not yet electric cooking) | 8  |
|                 | Amount                        | Number of elements or resources                       | -                                                                                                                           |    |
|                 | Time(s)                       | Number of lifecycles                                  | -                                                                                                                           |    |
|                 |                               | Expected lifespan                                     | What is/are the expected technical lifespan(s) of the entire kitchen and its elements?                                      | 9  |
|                 |                               |                                                       | What is/are the expected functional lifespan(s) of the entire kitchen and its elements?                                     | 10 |
|                 | Lifecycle stage               | Lifecycle stage of building component, part, material | -                                                                                                                           |    |
|                 | Circular design<br>strategies | Design for material reduction                         | Have strategies been used to ensure that less material is used? If yes which one?                                           | 11 |
|                 |                               | Design for energy reduction                           | Have strategies been applied to ensure that less energy is used? If yes which one?                                          | 12 |
|                 |                               | Design for attachment                                 | In which colors is the kitchen available as standard?                                                                       | 13 |

|                  |                                              |                                                                                                                                             |                 |
|------------------|----------------------------------------------|---------------------------------------------------------------------------------------------------------------------------------------------|-----------------|
| Industrial model |                                              | Have strategies been applied in the kitchen to increase the bond/attachment between the kitchen and the user? If yes which one?             | 14              |
|                  | Design for reliability and durability        | Have strategies been applied to increase the lifespan/sustainability of the kitchen? If yes which one?                                      | 15              |
|                  | Design for standardization and compatibility | Have strategies been applied to standardize the kitchen and the elements from which it is constructed? If yes which one?                    | 16              |
|                  | Design for ease of maintenance and repair    | Has ease of maintenance and repairs been considered in the design of the kitchen? If so, how?                                               | 17              |
|                  | Design for upgrades and adjustments          | Are tools needed to assemble the kitchen? And if so, which one?                                                                             | 18              |
|                  |                                              | To what extent is the kitchen adaptable after initial installation?                                                                         | 19              |
|                  |                                              | Does the kitchen design allow for upgrades and customizations? If so, how?                                                                  |                 |
|                  | Design for disassembly                       | Is the kitchen height adjustable? And if so, how?                                                                                           | 20              |
|                  |                                              | To what extent can plumbing be made flexibly and changed during their service life?                                                         | 21              |
|                  | Design for recycling                         | To what extent can the kitchen be disassembled and reassembled and how does that work?                                                      | 22              |
|                  |                                              | Has recycling of the parts/elements/entire kitchen been considered in the design of the kitchen? If so, how?                                | 23              |
|                  | -                                            | Describe your circular kitchen?                                                                                                             | 24              |
|                  |                                              | Do you have environmental impact results? If yes, how were these results calculated/which method is appropriate to calculate these results? | 25              |
|                  |                                              | Does the kitchen have any certificate related to sustainability?                                                                            | 26              |
|                  | Key partners                                 | Partners in supply chain or value network                                                                                                   | 27 <sup>1</sup> |
|                  |                                              | Which partners do you work with?                                                                                                            |                 |
| business model   |                                              | Who are the material suppliers? And what do they deliver?                                                                                   | 28              |
|                  | Key activities                               | Activities                                                                                                                                  | 29              |
|                  |                                              | Re-loop activities                                                                                                                          | 30              |
|                  |                                              | What agreements have been made about take-back with the suppliers?                                                                          |                 |
|                  |                                              | (re-) Production process per activity                                                                                                       | -               |
|                  | Key resources                                | Facilities for activities                                                                                                                   | 31              |
|                  |                                              | In which facilities are these activities performed? (Shops, factories, sorting points, etc.)                                                |                 |
|                  |                                              | System elements                                                                                                                             | 32              |
|                  |                                              | Which partners are responsible for which elements of the kitchen?                                                                           |                 |
|                  | Transport/logistics                          | Mode of transport                                                                                                                           | 33              |
|                  |                                              | How does delivery take place from the supplier to you?                                                                                      |                 |
|                  |                                              | Has thought been given to the transport from the kitchen to the customer/user?                                                              | 34              |
|                  |                                              | Distance                                                                                                                                    |                 |
|                  |                                              | Are parts made outside the Netherlands?                                                                                                     | 35              |
|                  | Process energy                               | Type of energy                                                                                                                              | 36              |
|                  |                                              | What kind of energy is used to produce the kitchen?                                                                                         |                 |
|                  | Key partners                                 | Partners in supply chain or value network                                                                                                   | 27 <sup>1</sup> |
|                  | Customer segments                            | Owner                                                                                                                                       | 37              |
|                  |                                              | Who owns the kitchen when using the kitchen?                                                                                                |                 |
|                  |                                              | Customer                                                                                                                                    | 38              |
|                  |                                              | Do you only deliver business to business or also business to customer?                                                                      |                 |
|                  |                                              | Do you deliver to a specific type of customer?                                                                                              | 39              |
|                  | Supply chain relations                       | Primary contact customer                                                                                                                    | -               |

|                   |                                            |                                                                                                                         |    |
|-------------------|--------------------------------------------|-------------------------------------------------------------------------------------------------------------------------|----|
|                   | Kind of customer relationship              | -                                                                                                                       |    |
|                   | Primary supply chain contact               | -                                                                                                                       |    |
|                   | Kind of collaboration                      | -                                                                                                                       |    |
| Cost structure    | Cost proposition                           | -                                                                                                                       |    |
| Revenue streams   | Financial arrangement                      | Under what conditions is the kitchen delivered: lease terms, warranty, conditions for take-back/purchase, etc.?         | 40 |
|                   | Income division                            | -                                                                                                                       |    |
| Value proposition | Product/service proposition                | What else is included in addition to the kitchen furniture? (Kitchen appliances, taps, etc.) And under what conditions? | 41 |
|                   |                                            | What agreements have been made about the maintenance of the kitchen?                                                    | 42 |
|                   | Value delivery                             | -                                                                                                                       |    |
|                   | Value capturing                            | -                                                                                                                       |    |
| Key resources     | Key resources per supply chain partner     | -                                                                                                                       |    |
| Channels          | Sale and (re)loop channels                 | Through which channels do you sell the kitchen? (webshop, telephone, shops, etc.)                                       | 43 |
|                   |                                            | Through which channels do you arrange returns?                                                                          | 44 |
| Take back systems | Facilities for take-back                   | What agreements have been made with suppliers of parts (and possibly equipment) of the kitchen about taking back?       | 45 |
| Adoption factors  | Circular business model's adoption factors | -                                                                                                                       |    |
|                   |                                            | What happens if the kitchen is damaged?                                                                                 | 46 |

<sup>1</sup> This question is deducted from two CBC sub-parameters.
