# Supplementary material
Source: MDPI journal article supplement (https://www.mdpi.com/2075-5309/13/7/1698)
Supplement: s1 [file s1]

Archive with 2 entries (2 files):
- SUPPLEMENTARY MATERIAL S1 - Comparing Ciruclar Kitchens.pdf
- SUPPLEMENTARY MATERIAL S2 - Comparing Ciruclar Kitchens.xlsx
