# Supplementary material
Source: MDPI journal article supplement (https://www.mdpi.com/2075-5309/13/7/1698)
Supplement: s1 [file s1 › SUPPLEMENTARY MATERIAL S2 - Comparing Ciruclar Kitchens.xlsx]

## Sheet: Blue kitchen 
		Antwoord (eigen website)	Codering	Opmerkingen	Antwoord ((social) Media)	Codering	Opmerkingen (bron info)	Gecombineerd
	Algemeen							A	PA	NA
1	Hoe heet jullie keuken?	BlueKitchen	A		BlueKitchen	A		1	0	0
2	Wat is jullie definitie van circulariteit?	x	NA			NA		0	0	1
3	Wanneer is de keuken aangekondigd?	x	NA			NA		0	0	1
4	Vanaf is de keuken beschikbaar voor afnemers?	x	NA			NA		0	0	1
5	Is de keuken het enige product dat jullie produceren?	Ja	A			NA		1	0	0
6	Zijn er nog ander partners betrokken bij het project? (Woningbouwcorporaties, toeleveranciers, aannemers etc.)	Materiaal producenten. Niaga, VDL, NIAGA, AEG en Gielissen.	A			NA		1	0	0
	Technisch model							11	4	12
1	Omschrijf jullie circulaire keuken	Een BlueKitchen bestaat uit de meest energiezuinige keukenapparaten, 60% minder plaatmateriaal dan een traditionele keuken, RVS klikbare frames en circulaire keukenbladen. BlueKitchen kent een no-nonsensebeleid, geen ingewikkelde termen en dure woorden, maar duidelijk en transparant in woord en daad. We gaan voor betrouwbaar en eerlijk en zijn wars van greenwashing. 1. Respect voor de natuur: Wei…	A			A		1	0	0
2	Met wat voor energie wordt de keuken geproduceerd?	x	NA			NA		0	0	1
3	Welke materialen worden voor de keuken gebruikt? (Biologisch vs. Technische materialen)	Plaatmateriaal van Niaga Samengeperst cellulose Pulp, platen worden verbonden door een ‘click-on-unclick’ adhesive. Vervolgens kunnen de platen gelamineerd worden. De platen zijn zo samengesteld dat de verschillende materialen ook weer gescheiden kunnen worden en vervolgens weer op hoogwaardige manier worden hergebruikt. De grondstoffen voor het plaatmateriaal zijn bierbostel, oude spijkerbroeken…	A			A		1	0	0
4	Zijn er plannen om deze materialen in de toekomst te wijzigen? Zo ja, welke?	x	NA			NA		0	0	1
5	Uit welke elementen is de keuken opgebouwd?	BlueKitchen is opgebouwd uit 4 elementen: 1) Een RVS Smartframe, waaraan de keukenonderdelen worden bevestigd. 2)Circulaire panelen die aan het frame worden gemonteerd. Hierin is keuze uit diverse materialen. 3)Een circulair aanrechtblad van EcoBoard. 4)Energiezuinige apparatuur van AEG .	A			A		1	0	0
6	Is er gereedschap nodig om de keuken in elkaar te zetten? En zo ja, welke?	x	NA			NA		0	0	1
7	In welke kleuren is de keuken standaard leverbaar?	Hout, Wit Zwart.	PA	Onduidelijk of er nog extra kleuren zijn.		NA		0	1	0
8	In hoeverre is de keuken aanpasbaar na eerste installatie? Biedt het ontwerp van de keuken mogelijkheden voor upgrades en aanpassingen? Zo ja, hoe?	Er is sprake een click systeem. Dit betekent dat de verschillende modules op volgorde en selectie naar keuze op de voorzetwand gezet kunnen worden.	A			NA		1	0	0
9	Is de keuken in hoogte verstelbaar? En zo ja, hoe?	Hoogte verstelbaar. Tijdens montage kan gekozen worden voor een specifieke hoogte. Dit kan in de toekomst nog aangepast worden door een monteur.	A			NA		1	0	0
10	Wordt de keuken aan de wand bevestigd, en zo ja, hoe?	x	NA			NA		0	0	1
11	Heeft uw keuken een voorzetwand nodig en hoeveel ruimte neemt deze in?	Er is sprake van een voorzetwand (dimensies ontbreken). BlueKitchen is ook bezig met het ontwikkelen van een vrijstaande keuken FreeKitchen.	A			NA		1	0	0
12	Bij toepassing van een voorzetwand, wanneer moet deze aan een (tussen)wand worden bevestigd?	x	NA			NA		0	0	1
13	Wat is/zijn de technische levensduur van de gehele keuken en de (losse) elementen?	Alleen uitspraak over lange levensduur.	PA		Panelen levensduur 15, 20 jaar. Frame 60 tot 80 jaar.	A		1	0	0
14	Wat is/zijn de functionele levensduur van de gehele keuken en de (losse) elementen?	x	NA			NA		0	0	1
15	Zijn er strategieën toegepast om ervoor te zorgen dat er minder materiaal wordt gebruikt? Zo ja, welke?	BlueKitchen gaat zeer kritisch om met de keuze en het gebruik van plaatmateriaal voor de deuren en plinten. Dat betekent dat Bluekitchen, door haar slimme ontwerp, 60% minder plaatmateriaal gebruikt dan een traditionele keuken van dezelfde afmetingen.	PA	dit komt door gebruik stalenframe, hierdoor is er geen sprake van kastjes rijgen.		NA		0	1	0
16	Zijn er strategieën toegepast om ervoor te zorgen dat er minder energie wordt gebruikt? Zo ja, welke?	x	NA			NA		0	0	1
17	Zijn er in het strategieën toegepast om verbintenis/hechting tussen de keuken en de gebruiker te vergroten? Zo ja, welke?	Gebruik van infographics op de website.	A			NA		1	0	0
18	Zijn er in het strategieën toegepast om levensduur/duurzaamheid van de keuken te vergroten? Zo ja, welke?	De keuze voor een stalenframe zorgt voor een langere levensduur.	PA	Alleen uitspraak over het frame niet over de panelen.		NA		0	1	0
19	Zijn er in het strategieën toegepast om de keuken en de elementen waaruit deze opgebouwd is te standaardiseren? Zo ja, welke?	x	NA			NA		0	0	1
20	Is er bij het ontwerp van de keuken rekening gehouden met gemak van onderhoud en reparaties? Zo ja, hoe?	x	NA			NA		0	0	1
21	In hoeverre kunnen aansluitingen van leidingen flexibel worden aangebracht en gedurende de levensduur worden gewijzigd?	x	NA			NA		0	0	1
22	Is er in het ontwerp van de keuken rekening gehouden met recycling van de onderdelen/elementen/hele keuken? Zo ja, hoe?	De panelen zijn 100% biobased daarom zijn de ook 100% recyclebaar.	PA	Alleen uitspraak over de panelen niet over het frame.	Op de inbouwapparatuur, scharnieren en kranen is de keuken volledig circulair.	A		1	0	0
23	In hoeverre is de keuken de- en re-montabel en hoe werkt dat?	Volledig re- en de-montabel. Specifieke kennis over hoe ontbreekt.	PA			NA		0	1	0
24	Hebben jullie resultaten van de milieu-impact? Zo ja, hoe zijn deze resultaten berekend/welke methode is te gepast om deze resultaten te berekenen?	x	NA			NA		0	0	1
25	Heeft de keuken een dubokeur en/of hebben de toegepaste materialen een FSC- of PEFC-keurmerk en/of een ander keurmerk?	FSC, Energielabel A++, Cradle to Cradle (is di teen keurmerk?), Lid van Maatschappelijk Verantwoord Ondernemen MVO, Der Blaue Engel een Duitse certificering die onder meer betrekking heeft op de emissie van formaldehyde en vluchtige organische stoffen. Het Pfleiderer paneel in de selectie van BlueKitchen heeft dit certificaat gekregen.	A			NA		1	0	0
26	Wordt er bij de keuken ook apparatuur geleverd? Zo ja, welke en is deze ook circulair?(in het geval van nog niet elektrisch koken)	Apparatuur van AEG. Deze is momenteel nog niet circulair. Wel is BlueKitchen (milieu)kritisch op de fabrikant en zijn er fabrikanten gekozen die zuinige apparaten leveren, met een lange levensduur, uit fabrieken die op MVO-gebied de boventoon voeren. Daarnaast zijn er afspraken gemaakt om het hergebruikpercentage van de onderdelen in de komende jaren op te voeren. BlueKitchen heeft de partners ve…	A		BLUM AEG hebben zich eraan gecommitteerd om hun apperatuur en scharnieren over een paar jaar circulair te hebben.	A	Aanvullende informatie. Via Circulaire maakindustrie	1	0	0
27	Kan de keuken later worden aangepast aan elektrisch koken? Zo ja, hoe?	x	NA			NA		0	0	1
	Industrieel model							0	6	3
1	Met welke partners werken jullie samen?	VDL, AEG, Gielissen, Niaga Pfleiderer.	PA	Informatie over andere keten paterners ontbreekt.	Atelier Denessen Architectuur, Arte, Finance Bizniz, B/S/H/, Grohe, Unilin	PA	Via Duurzaam Ondernemen. Andere partners dan vermeld op website. Informatie via Duurzaam ondernemen. Artikel stamt uit feb 2020, mogelijk zijn de partners veranderd.	0	1	0
2	Welke activiteiten voeren de partners uit?	Productieactiviteiten: VDL: stalenframe AEG: Keukenapparatuur Gielissen: Plaatmateriaal Niaga: Plaatmateriaal Pfleiderer: Productie van houten materialen, specifieke kennis over welk onderdeel ze produceren ontbreekt.	PA	Informatie over andere keten paterners ontbreekt.	x	NA		0	1	0
3	In welke faciliteiten worden deze activiteiten uitgevoerd? (Winkels, fabrieken, sorteerpunten, etc.)	Productie activiteiten vinden plaats in fabrieken	PA	Onduidelijk waar andere ketenactiviteiten plaatsvinden.	x	NA		0	1	0
4	Welke partners zijn voor welke elementen van de keuken verantwoordelijk?	x	NA		Zelf bouw en produceert BlueKitchen niks. Ze brengen enkel partijen bijelkaar die de productie van de keukens doen.	PA	Info gevonden: Circulaire Maakindustrie. Info over activiteiten als assemblage ontbreekt.	0	1	0
5	Hoe vindt toelevering plaats van de toeleverancier naar jullie?	x	NA		x	NA		0	0	1
6	Worden onderdelen buiten NL gemaakt?	x	NA		x	NA		0	0	1
7	Wie zijn de materiaalleveranciers? En wat leveren ze?	VDL, Gliessen, Niaga,Pfleider, EcoBoard	PA	Niet alle materiaalleveranciers zijn bekend	x	NA		0	1	0
8	Welke afspraken zijn er gemaakt over terugname met de toeleveranciers?	x	NA		x	NA		0	0	1
9	Is er nagedacht over het vervoer van de keuken naar de klant/gebruiker?	Door het modulaire karakter van de keuken kan vervoer efficiënt plaatsvinden, vaak in een vrachtwagen.	PA		x	NA		0	1	0
	Business model							2	2	6
1	Wie is er bij gebruik van de keuken eigenaar van de keuken?	x	NA		Ambitie om product as a service aan te bieden. Maandelijks vast bedrag, inclusief service, onderhoud en hergebruik. Oorspronkelijk was BlueKitchen een leasebedrijf voor keukens en badkamers nu ligt de focus op het op de rit krijgen van alle technische aspecten.	A	Via Circulaire Maakindustrie	1	0	0
2	Onder welke voorwaarden wordt de keuken geleverd: leasetermijnen, garantie, voorwaarden voor terugname/koop etc.?	x	NA		BlueKitchen neemt de keuken terug als het einde van de levenscyclus bereikt is.	PA	Via Circulair ondernemen.	0	1	0
3	Leveren jullie alleen business to business of ook business to costumer?	x	NA		B2B ambitie om de commerciele markt op te gaan	A	Via Circulaire Maakindustrie (mei 2021)	1	0	0
4	Leveren jullie aan een specifiek soort klant? (Rijk/arm, particuliere woningverhuurder/corporatie, etc.)	x	NA		x	NA		0	0	1
5	Wat wordt er naast het keukenmeubel nog meer bijgeleverd? (Keukenapparatuur, kranen etc.) En onder welke voorwaarden?	x	NA		x	NA		0	0	1
6	Via welke kanalen verkopen jullie de keuken? (Webshop, telefonisch, winkels etc.)	x	NA		x	NA		0	0	1
7	Via welke kanalen regelen jullie terugnamen?	x	NA		x	NA		0	0	1
8	Wat gebeurt er bij beschadigingen van de keuken?	x	NA		x	NA		0	0	1
9	Wat voor afspraken zijn er gemaakt over het onderhoud van de keuken?	x	NA		BlueKitchen is verantwoordelijk voor het onderhoud. Indien gewenst kan de organisatie dit ook zelf ter hand nemen. Medewerkers van de organisatie ontvangen hiervoor een gratis instructietraining van BlueKitchen.	PA	Via Circulair ondernemen. Geen uitspraak over prijs van onderhoud. Onderhoudsdienst lijkt eerste stap richting Kitchen-as-a-Service.	0	1	0
10	Welke afspraken zijn er gemaakt met toeleveranciers van onderdelen (en eventueel apparatuur) van de keuken over terugname?	x	NA		x	NA		0	0	1
	Afsluitend
1	Zou je nog iets willen veranderen/verbeteren aan de keuken?		NA			NA		0	0	1

## Sheet: Chainable
		Antwoord (eigen website)	Codering	Opmerkingen	Beschikbaarheid			Antwoord (interview)	Codering	Opmerkingen (bron info)	Beschikbaarheid
	Algemeen				A	PA	NA				A	PA	NA
1	Hoe heet jullie keuken?	Chainable Keuken	A		1	0	0	Chainable Keuken	A		1	0	0
2	Wat is jullie definitie van circulariteit?		NA		0	0	1	Chainable ’s definitie van circulariteit: Gestoeld op de drie pijlers die ook gehanteerd worden door TU Delft. Industrieel model, technisch model en businessmodel. Doel circulaire economie (CE): In eerste instantie gericht op het sluiten van materiaalstromen. Daarnaast moet het ook op sociaal vlak kloppen. Het doel is uiteindelijk een systeemverandering.	A		1	0	0
3	Wanneer is de keuken aangekondigd?		NA		0	0	1	2020-06-15	A		1	0	0
4	Vanaf is de keuken beschikbaar voor afnemers?		NA		0	0	1	2,5 maand later eerste keukens geplaatst	A		1	0	0
5	Is de keuken het enige product dat jullie produceren?		NA		0	0	1	Chainable produceert alleen een keuken. Op aanvraag kan dat nog wel een uitgebreidere opdracht zijn. Het idee is wel om in de toekomst nog uit te breiden.	A		1	0	0
6	Zijn er nog ander partners betrokken bij het project? (Woningbouwcorporaties, toeleveranciers, aannemers etc.)		NA		0	0	1	Alles wat te maken heeft met de ontwikkeling van de circulaire keuken in zijn geheel is in eigen beheer. Denk hierbij aan bijvoorbeeld een R&D afdeling en een circulair engineer die nadenkt over de vormgeving van het product en hoe de principes van de CE worden toegepast in de keuken. Bij de ontwikkeling van sub-elementen als het frame etc. wordt input gevraagd van toeleveranciers. Ook wordt de e…	A		1	0	0
	Technisch model				9	6	12				24	1	2
1	Omschrijf jullie circulaire keuken		NA		0	0	1	De keuken is opgebouwd uit een modulair (klikbaar), stalen frame. Alle bewegende onderdelen en verbindingen bevestigd aan dit stalen frame. De modulariteit van het frame zorgt voor dat de keuken makkelijk te repareren is.	A		1	0	0
2	Met wat voor energie wordt de keuken geproduceerd?		NA		0	0	1	Over het algemeen is er voor industrie panters gekozen voor Europese bedrijven met duurzame ambities. Zo draait de productie van leverancier Arte 100% op groene energie, Multidesk maakt heeft zo’n 75% groene stroom (425.000 kWh per jaar) dit is afkomstig van ongeveer 2000 zonnepanelen, heeft BSH het streven om klimaat neutraal te zijn in 2025, produceert Blum van Hoecke zo duurzaam mogelijk. Er z…	A		1	0	0
3	Welke materialen worden voor de keuken gebruikt? (Biologisch vs. Technische materialen)	o Plaatmateriaal, 90% sloophout. In het sloophout is formaldehyde verwerkt o Plaatmateriaal van 100% herwonnen hout o Stalen frame, 25% gemaakt van gerecycled staal o Scharnieren: vernikkeld metaal o Arte granieten bladen o Blum ladesystemen	PA	Tegenstrijdige informatie over materialen (plaatmateriaal). https://www.chainable.nl/the-natural-step/	0	1	0	Het plaatmateriaal bestaat uit 100% herwonnen hout. 90% van dit hout is sloophout (post-consumer). 10% van het herwonnen hout bestaat uit hout van rest stromen (pre-consumer), denk bijvoorbeeld aan bermafval, snoeiafval etc.. Het stalen frame is voor 25% gemaakt van gerecycled staal, ook wel schroot staal. Een kanttekening die hierbij geplaatst moet worden is dat de producent op dit moment alleen…	A		1	0	0
4	Zijn er plannen om deze materialen in de toekomst te wijzigen? Zo ja, welke?	x	NA		0	0	1	Er wordt altijd gekeken naar betere opties voor materiaal. Over het algemeen geldt dat het materiaal vervangen wordt als er sprake is van een materiaal dat voldoet aan de volgende eisen:  Kosten efficiënter  Milieu kosten efficiënter  Kwalitatief beter materiaal  20 jaar garantie Er zijn experimenten met Ecor en andere materialen die gebruikt worden door de concurrenten maar deze hadden niet …	A		1	0	0
5	Uit welke elementen is de keuken opgebouwd?	Stalen frame waarop ladegeleiders en scharnieren worden gemonteerd waar de lades en deurtjes ingeklikt kunnen worden.	A	https://www.chainable.nl/circulaire-keuken/frame-de-basis-voor-een-circulaire-keuken/	1	0	0	De keuken is opgebouwd uit een stalen frame waarop de ladegeleiders en scharnieren worden gemonteerd. Vervolgens worden de deurtjes en de afwerkingspanelen in de verbindingen op het frame geklikt. Het stalen frame is niet dubbel waardoor er geen sprake is van twee kastjes tegen elkaar met een op zichzelf staande constructie. Dit zorgt voor materiaal besparing.	A		1	0	0
6	Is er gereedschap nodig om de keuken in elkaar te zetten? En zo ja, welke?	x	PA		0	1	0	 Schroefmachine (torx 20)  Kruiskopschroevendraaier  Inbussleutel (zijpanelen) (werkt als een slot)  Kit (spoelbak, onderkant)	A		1	0	0
7	In welke kleuren is de keuken standaard leverbaar?	Imitatie hout Wit Grijs groen	A	3 van de 4 kleuren te vinden	1	0	0	De keuken is verkrijgbaar in de volgende vier standaardkleuren:  Gebroken wit  Wit  Grijs  Groen Er was eerder ook sprake van imitatie hout, maar doordat de nerven goed op elkaar moesten aansluiten, voor esthetische reden, zorgde dit voor veel snijafval. Daardoor is de keuze gemaakt om de keuken uit het assortiment te halen. In grote oplage zijn andere kleuren dan de standaardkleuren ook moge…	A		1	0	0
8	In hoeverre is de keuken aanpasbaar na eerste installatie? Biedt het ontwerp van de keuken mogelijkheden voor upgrades en aanpassingen? Zo ja, hoe?	Niet flexibel in deelbaar, er is sprake van verschillende modellen. Circulaire project keukens: Verkrijgbaar zonder en met bovenkastjes in drie varianten waarin het verschil zit in de bijgeleverde apparatuur: - Basic (afzuigkap, inductiekookplaat) - Impact (afzuigkap, inductiekookplaat, inbouwkoelkast, inbouwoven) - Premium ((afzuigkap, inductiekookplaat, inbouwkoelkast, inbouwoven, inbouwvaatwas…	A		1	0	0	De keuken is flexibel indeelbaar binnen een standaardisatie systeem. Het frame is opgebouwd uit r’tjes (verwijst naar de vorm van het stalenframe) en een sluitstuk. Wanneer de keuken uitgebreid moet worden kan er een r’tje aan toegevoegd worden en verplaatst het sluitstuk. De circulaire project keuken is verkrijgbaar met en zonder bovenkastjes in drie varianten waarin het verschil zit in de bijge…	A		1	0	0
9	Is de keuken in hoogte verstelbaar? En zo ja, hoe?	Nee het stalen frame is enkel te stellen voor stabiliteit.	PA	Inpliciet	0	1	0	Te stellen door professionals (max. 5 cm)	A		1	0	0
10	Wordt de keuken aan de wand bevestigd, en zo ja, hoe?	Geen voorzetwand	PA		0	1	0	Er is sprake van een vrijstaand meubel, maar voor de veiligheid hangt de keuken in de muur. De keuken is op zichzelf dragend; de keuken hangt niet.	A		1	0	0
11	Heeft uw keuken een voorzetwand nodig en hoeveel ruimte neemt deze in?	Er is geen sprake van een voorzetwand	A		1	0	0	Er is geen sprake van een voorzetwand, maar wel een achterwand die in de keuken verwerkt is. Deze achterwand kan gemaakt zijn van hardglas of van hetzelfde materiaal als de fronten. Het gebruik van een geïntegreerde achterwand geeft veel voordelen in de renovatie markt. De keuken kan namelijk geplaatst worden een onafgewerkte muur zonder dat daar veel aan hoeft te gebeuren.	A		1	0	0
12	Bij toepassing van een voorzetwand, wanneer moet deze aan een (tussen)wand worden bevestigd?	Er is geen sprake van een voorzetwand	A		1	0	0	n.v.t.	NA		0	0	1
13	Wat is/zijn de technische levensduur van de gehele keuken en de (losse) elementen?	x	NA		0	0	1	Staal: 120 jaar Granieten blad: geen specifiek jaar genoemd, maar de technische levensduur is wel een stuk langer dan de functionele levensduur. Fronten: 20 jaar, voorkant buitenwerks 20 jaar, binnenwerks 30 jaar	A		1	0	0
14	Wat is/zijn de functionele levensduur van de gehele keuken en de (losse) elementen?		NA		0	0	1	Frame: 60 jaar Fronten: Door trendgevoeligheid ligt de functionele levensduur lager dan de technische levensduur van de fronten. Binnenwerk is wit uitgevoerd, zodat het binnenwerk kan blijven zitten. Meubelbeslag (scharnieren en geleiders): 30 jaar Blad: 60 jaar (onderhoud in de vorm van polijsten elke 20 jaar) Apparatuur: 10 jaar Kraan spoelbak: 15, 20 jaar Initieel hebben de keukens misschien e…	A		1	0	0
15	Zijn er strategieën toegepast om ervoor te zorgen dat er minder materiaal wordt gebruikt? Zo ja, welke?	Door gebruik van het stalen frame is er geen sprake meer van kastjes die tegen elkaar worden aangebouwd. 47% minder plaatmateriaal.	A	https://www.chainable.nl/circulaire-keuken/frame-de-basis-voor-een-circulaire-keuken/ https://www.chainable.nl	1	0	0	Er is sprake van de volgende hoofd strategieën hoofdstrategieën:  Altijd een lange levenscyclus nastreven  Altijd minder materiaal nastreven  Altijd zo veel mogelijk hergebruikt materiaal toepassen  Alles moet losmaakbaar zijn zodat het makkelijker opnieuw kan toegepast worden en gebruikt kan worden in de hoogst mogelijke waarde. De specifieke strategie is de 10 r’en. Deze 10 r’en staan ook s…	A		1	0	0
16	Zijn er strategieën toegepast om ervoor te zorgen dat er minder energie wordt gebruikt? Zo ja, welke?	De keuken wordt geleverd met energiezuinige apparatuur van Bosch	A	https://www.chainable.nl	1	0	0	Hiervoor is vooral gekeken naar energiezuinigere apparatuur, aangezien apparatuur een groot aandeel heeft in de uitstoot van een keuken. Zo is 80-90% van de uitstoot over de levensduur van een keuken niet de keuken zelf, maar het gebruik van de componenten in de keuken. Alle keukens worden daarom geleverd door energiezuinige apparatuur van Bosch en Atag.	A		1	0	0
17	Zijn er in het strategieën toegepast om verbintenis/hechting tussen de keuken en de gebruiker te vergroten? Zo ja, welke?	x	NA		0	0	1	Er is sprake van een QR-code op elke keuken. Dit geeft informatie over:  De keuken zelf, en wat het betekend om een circulaire keuken te ¬¬hebben. Hoeveel impact heeft de keuken? Hoe zit het met het onderhoud?  Bij Chainable is er sprake van preventief onderhoud. Dus de gebruiker kan een services verzoek indienen en dan komt Chainable de keuken maken. Dit is een belangrijk aspect want dit zorgt…	A		1	0	0
18	Zijn er in het strategieën toegepast om levensduur/duurzaamheid van de keuken te vergroten? Zo ja, welke?	Het stalen frame heeft een levensduur van 60 jaar. 3 keer de levensduur van een keuken.	PA	Https://www.chainable.nl/circulaire-keuken/frame-de-basis-voor-een-circulaire-keuken/	0	1	0	Strategieën voor het vergroten van de levensduur zit bij Chainable vooral in het preventief onderhoud. Dit onderhoud vindt elke vijf jaar plaats. Dit houdt bijvoorbeeld in dat de ladengeleiders gesmeerd worden, eventueel deurtjes vervangen worden en hoekjes gemaakt worden etc. Dit preventieve onderhoud zorgt ervoor dat de restwaarde gegarandeerd kan worden maar ook dat het onderhoudt minder duur …	A		1	0	0
19	Zijn er in het strategieën toegepast om de keuken en de elementen waaruit deze opgebouwd is te standaardiseren? Zo ja, welke?	x	NA		0	0	1	Alles is gestandaardiseerd op 32 mm, deze maatvoering is algemeen voor de keukenbranche. Dit zorgt ervoor dat veel van de boringen op dezelfde plek zitten, en voor multi-inzetbaarheid. Kortom zorgt de gestandaardiseerde maatvoering ervoor dat de keuken uitwisselbaar is met andere keukens. Voor de rest van de maatvoering zijn de volgende standaardmaten doorgevoerd: 30cm, 45cm, 60cm en 90cm. Voor h…	A		1	0	0
20	Is er bij het ontwerp van de keuken rekening gehouden met gemak van onderhoud en reparaties? Zo ja, hoe?	Door gebruik van een basis frame waarop de lades en de kastjes worden gemonteerd kunnen aparte onderdelen vervangen worden.	A		1	0	0	n de keuken is overal spraken van 6mm restruimte, bijvoorbeeld bij het bovendek en de deurtjes of de zijpanelen. Dit is precies de ruimte die je nodig hebt om een paneel uit de verbinding te tillen. Zo kan je alles altijd makkelijk in het werk repareren, losmaken en vervangen.	A		1	0	0
21	In hoeverre kunnen aansluitingen van leidingen flexibel worden aangebracht en gedurende de levensduur worden gewijzigd?	x	NA		0	0	1	De aansluiting van de leidingen is heel flexibel. Er is een stekkertje naar de keuken en daar wordt de elektra over de keuken verdeeld. Op het moment dat je wijzigingen aanbrengt in de keuken heb je een kastje in de keuken waar je een ander stekkertje aan maakt. Aan- en afvoer van water zit op een vaste plek. Daar is op in gespeeld spelen met flexibele aansluitingen. Aan de achterkant van ons fra…	A		1	0	0
22	Is er in het ontwerp van de keuken rekening gehouden met recycling van de onderdelen/elementen/hele keuken? Zo ja, hoe?	x	NA		0	0	1	Het gehele concept van de keuken is gestoeld op hergebruik van materiaal. Hierbij is recyclen wel de laatste optie. Eerst wordt gekeken hoe het materiaal opnieuw kan worden toegepast.	A		1	0	0
23	In hoeverre is de keuken de- en re-montabel en hoe werkt dat?	De keuken bestaat uit droge verbindingen en is vrijstaand. Dit maakt dat de keuken de- en re-montabel is tot het stalen frame, ladegeleiders en scharnieren en deurtjes.	A		1	0	0	Alle componenten zijn losmaakbaar. Chainable heeft een losmaak-index van 0.86 (berekend door Alba concpets) op een schaal van 0-1, maar Chainable verstaat re-montabel als een concept dat verder gaat dan enkel losmaakbaarheid. Er is bewust gekozen voor een stalen frame. Dit komt omdat een stalen frame nauwelijks werking kent en daarom goed re-montabel is, in tegenstelling tot een houten frame. De …	A		1	0	0
24	Hebben jullie resultaten van de milieu-impact? Zo ja, hoe zijn deze resultaten berekend/welke methode is te gepast om deze resultaten te berekenen?	x	NA		0	0	1	a. Zo ja, hoe zijn deze resultaten berekend/welke methode is te gepast om deze resultaten te berekenen? Methode die gebruikt is: Nationaal Milieu Database en Sima Pro Zowel een comperative LCA als een stand-alone LCA uitgevoerd. Deze moet nog geverifieerd worden. Dit betekend dat er opnieuw een epd opgesteld moet worden. Chainable hoopt dit gedaan te krijgen doormiddel van een prijsvraag.	PA		0	1	0
25	Heeft de keuken een dubokeur en/of hebben de toegepaste materialen een FSC- of PEFC-keurmerk en/of een ander keurmerk?	x	NA		0	0	1	FSC keurmerk en binnenkort ook een KIWA keurmerk.	A		1	0	0
26	Wordt er bij de keuken ook apparatuur geleverd? Zo ja, welke en is deze ook circulair?(in het geval van nog niet elektrisch koken)	Er wordt energiezuinig Bosch apparatuur geleverd bij de keukens. Circulair?	PA		0	1	0	Alle keukens worden geleverd met energiezuinige apparatuur van Atag of Bosch. Deze merken zijn beide bezig met het ontwikkelen van circulaire apparatuur, deze wordt echter nog niet geleverd. Atag wil met Chainable een refurbish lijn opstarten. Op dit moment bezit Atag wel de technische kennis, maar nog niet de faciliteiten. Ook heeft het topmanagement van Bosch aangegeven dat Chainable een prikke…	A		1	0	0
27	Kan de keuken later worden aangepast aan elektrisch koken? Zo ja, hoe?	x	NA		0	0	1	Alleen inductie.	A		1	0	0
	Industrieel model				2	2	5				8	0	1
1	Met welke partners werken jullie samen?	o Cirkelstad o Fontys o b/s/h/ o Unilin o Grohe o Arte o Van Hoeke o Hvl o Multidesk o Avans hogeschool o Braventure o Ecodorp o Urban mining collective o Social enterprise	A		1	0	0	Cirkelstad Fontys b/s/h/ Unilin Grohe Arte Van Hoeke HVL /VDL Multidesk Avans hogeschool Braventure Ecodorp Urban mining collective Social enterprise DPS TU Delft HvA	A		1	0	0
2	Welke activiteiten voeren de partners uit?	Ontwikkel samenwerkingen: o Fontys o Cirkelstad o Avans hogeschool o Ecodorp o Urban mining collective o Social enterprise Ketenpartners: Apparatuur: o b/s/h/ o Grohe: keuken sanitair Materiaal: o Unilin o Van Hoeke o Multidesk o Hvl o Arte	PA		0	1	0	Ontwikkel samenwerkingen: Fontys Cirkelstad Avans hogeschool Ecodorp (proeftuin) Urban mining collective (oogsten materialen) Social enterprise HvA Ketenpartners: Apparatuur: b/s/h/ (Bosch) Atag Grohe: keuken sanitair Materiaal: Unilin Van Hoeke Multidesk HVL/VDL Arte Transport partner: Triple G De taken van de Industrie partners is het leveren materialen en apparatuur vervolgens is Chainable ver…	A		1	0	0
3	In welke faciliteiten worden deze activiteiten uitgevoerd? (Winkels, fabrieken, sorteerpunten, etc.)	x	NA		0	0	1	-	NA		0	0	1
4	Welke partners zijn voor welke elementen van de keuken verantwoordelijk?	Industrie partners leveren materialen en apparatuur vervolgens is Chainable verantwoordelijk voor de volgende stappen: Assemblage en Productie Kwaliteitscontrole Opslag Distributie en installatie Terugname en aflevering bij de ketenpartners	PA		0	1	0	In principe koopt Chainable alle garantie af voor twee jaar. Behalve bij de apparatuur. Daar blijft de leveranciers verantwoordelijk.	A		1	0	0
5	Hoe vindt toelevering plaats van de toeleverancier naar jullie?	x	NA		0	0	1	Logistieke partijen worden ingehuurd. Die het transport regelen met vrachtwagens.	A		1	0	0
6	Worden onderdelen buiten NL gemaakt?	x	NA		0	0	1	Alle grote leveranciers zijn gevestigd in Brabant. Arte zit in Brabant De panelen in Culemborg Sociale werkplaats waar wel eens mee gewerkt wordt in Tilburg. Grohe: Brabant DPS: Brabant Unilever Brabant Blum: net over de grens in België Recyclen van de keukens: Eerst naar een recycle hub. Als de volumes groot genoeg zijn gaan ze met de boot naar België. Staal: Regio Eindhoven, geproduceerd in Noo…	A		1	0	0
7	Wie zijn de materiaalleveranciers? En wat leveren ze?	o Unilin: panelen o Van Hoecke: Ladensysteem o Multidesk: Werkbladen o Hvl: Staal o Arte: Granieten bladen	A		1	0	0	Unilin: panelen Van Hoecke: Ladensysteem Multidesk: Werkbladen Hvl: Staal Arte: Granieten bladen	A		1	0	0
8	Welke afspraken zijn er gemaakt over terugname met de toeleveranciers?	x	NA		0	0	1	Alles wordt in principe teruggenomen door de toeleveranciers. Partners hoeven nog niet exact te weten wat er met de teruggenomen materialen gebeurt, als er maar in een samenwerkingsovereenkomst of een intentieovereenkomst staat dat jullie het materiaal op de hoogst mogelijke manier opnieuw gaan inzetten. Dit zorgt voor interessante gesprekken! Want dan ben je de keten aan het veranderen. Chainabl…	A		1	0	0
9	Is er nagedacht over het vervoer van de keuken naar de klant/gebruiker?	x	NA		0	0	1	Flat pack transport. Chainable plaatst wel de kant tekening dat sommige monteurs wel liever halffabricaten monteren. Bijvoorbeeld: keuken van 180cm, je monteert de eerste 60cm en de laatste 60cm assembleer je al prefab. Op locaties worden de halffabricaten dan verder gemonteerd.	A		1	0	0
	Business model				6	1	3				9	1	0
1	Wie is er bij gebruik van de keuken eigenaar van de keuken?	Chainable maakt gebruik van drie scenario’s. a. Magere K-A-A-S: In dit scenario koop je zowel het de keuken en de keukenapparatuur. In dit scenario is er sprake van een terugkoopverklaring en zal Chainable aan het eind van de levensduur de keuken terugkopen. b. Milde K-A-A-S: In dit scenario wordt de keuken gekocht en de keukenapparatuur geleased. Ook in dit scenario geld dat Chainable aan het ei…	A	https://www.chainable.nl/uncategorized/chainable-de-eerste-echte-circulaire-keuken/ https://www.chainable.nl/kitchen-as-a-service/	1	0	0	Chainable maakt gebruik van drie scenario’s. a. Magere K-A-A-S: In dit scenario koop je zowel het de keuken en de keukenapparatuur. In dit scenario is er sprake van een terugkoopverklaring en zal Chainable aan het eind van de levensduur de keuken terugkopen. b. Milde K-A-A-S: In dit scenario wordt de keuken gekocht en de keukenapparatuur geleased. Ook in dit scenario geld dat Chainable aan het ei…	A		1	0	0
2	Onder welke voorwaarden wordt de keuken geleverd: leasetermijnen, garantie, voorwaarden voor terugname/koop etc.?	Zie vraag 1 businessmodel De leaseperiode loop 15 of 20 jaar. Chainable is verantwoordelijk voor terugname.	A	https://www.chainable.nl/kitchen-as-a-service/	1	0	0	Volledig terugkoop en garantie. De leaseperiode loop 15 of 20 jaar.	A		1	0	0
3	Leveren jullie alleen business to business of ook business to costumer?	Beide, Chainable biedt zowel een projectkeuken (particulieren) als een corporatiekeuken (woningbouwcorporaties) aan.	A		1	0	0	Alleen B2B. B2C alleen showroom.	A		1	0	0
4	Leveren jullie aan een specifiek soort klant? (Rijk/arm, particuliere woningverhuurder/corporatie, etc.)	x	A		1	0	0	Alleen niet het absolute topsegment.	A		1	0	0
5	Wat wordt er naast het keukenmeubel nog meer bijgeleverd? (Keukenapparatuur, kranen etc.) En onder welke voorwaarden?	Naast het keukenmeubel wordt het volgende geleverd: - Kranen - Verschillende keukenapparatuur afhankelijk van welke model (zie vraag 8 technisch model)	A		1	0	0	Naast het keukenmeubel wordt het volgende geleverd: Kranen Verschillende keukenapparatuur afhankelijk van welke model (zie vraag 8 technisch model)	A		1	0	0
6	Via welke kanalen verkopen jullie de keuken? (Webshop, telefonisch, winkels etc.)	x	NA		0	0	1	Er wordt, op dit moment, toegewerkt naar een online-configurator. Toch blijft voor Chainable een keuken verkopen wel vooral mensenwerk. Het is belangrijk dat de kant de materialen kan zien en in het echt kan ervaren. Daarom wordt er nu ook gewerkt aan een showroom. Daarnaast is de keuken nu ook te zien in verschillende demowoningen: Expertisecentrum (Nijmegen), In the middle of our street (Amster…	A		1	0	0
7	Via welke kanalen regelen jullie terugnamen?	x	NA		0	0	1	Terugnamen wordt geregeld via circulaire hubs. Deze zijn nu nog in ontwikkeling. Hierin is Chainable opzoek naar de beste geografisch strategie voor het plaatsen van de circulaire hubs.	PA		0	1	0
8	Wat gebeurt er bij beschadigingen van de keuken?	x	NA		0	0	1	In principe komt Chainable de keuken maken bij beschadigingen. De uitzondering hiervan is, vandalisme. De vraag is natuurlijk wel hoe bepaal je wanneer er sprake is van vandalisme. En de vraag is natuurlijk ook of je wil afzien van onderhoud, want je gaat wel een lang traject in met een eindgebruiker.	A		1	0	0
9	Wat voor afspraken zijn er gemaakt over het onderhoud van de keuken?	Chainable is verantwoordelijk voor het onderhoud van de keuken. https://www.chainable.nl/kitchen-as-a-service/	PA	Er wordt alleen vermeld dat Chainable verantwoordelijk is voor onderhoud. Niet welke afspraken gemaakt zijn.	0	1	0	Chainable is verantwoordelijk voor het onderhoud van de keuken. Soms is het ook uitbesteed. Met een grote corporatie wordt er samengewerkt (servicelevel agreement) Chainable zorgt voor materiaal etc. corporatie reageert op services verzoek.	A		1	0	0
10	Welke afspraken zijn er gemaakt met toeleveranciers van onderdelen (en eventueel apparatuur) van de keuken over terugname?	x	A		1	0	0	Alleen bij BSH is terugname juridisch bindend. De rest is allemaal onder intentieverklaringen.	A		1	0	0
	Afsluitend
1	Zou je nog iets willen veranderen/verbeteren aan de keuken?				0	0	0	• Sneller monteren • Minder staal (CO2 impact) • Kostentechnisch beter meekunnen met de lineaire keukens			0	0	0

## Sheet: Coulisse
		Antwoord (eigen website)	Codering	Opmerkingen	Antwoord ((social) Media)	Codering	Opmerkingen (bron info)	Gecombineerd
	Algemeen							A	PA	NA
1	Hoe heet jullie keuken?	Coulisse Keuken	A		Coulisse Keuken	A		1	0	0
2	Wat is jullie definitie van circulariteit?	x	NA		x	NA		0	0	1
3	Wanneer is de keuken aangekondigd?	x	NA		x	NA		0	0	1
4	Vanaf is de keuken beschikbaar voor afnemers?	x	NA		x	NA		0	0	1
5	Is de keuken het enige product dat jullie produceren?	x	NA		x	NA		0	0	1
6	Zijn er nog ander partners betrokken bij het project? (Woningbouwcorporaties, toeleveranciers, aannemers etc.)	x	NA		x	NA		0	0	1
	Technisch model							7	2	18
1	Omschrijf jullie circulaire keuken	x	NA		Solitair Modulair Circulaire Materialen Zeer korte installatietijd Minder voorbereidende werkzaamheden bouwzijds Eenvoudig verhuisbaar	A	Uitgangspunten circulaire keuken. https://www.youtube.com/watch?v=9U2shM51KHc	1	0	0
2	Met wat voor energie wordt de keuken geproduceerd?	x	NA		x	NA		0	0	1
3	Welke materialen worden voor de keuken gebruikt? (Biologisch vs. Technische materialen)	x	NA		x	NA		0	0	1
4	Zijn er plannen om deze materialen in de toekomst te wijzigen? Zo ja, welke?	x	NA		x	NA		0	0	1
5	Uit welke elementen is de keuken opgebouwd?	Een buizenframes in standaard maatvoering (materiaal?) in standaard maatvoering. In dit frame zijn alle onderdelen voor bewegende delen als ladegeleiding etc. reeds opgenomen. Op het frame wordt ook de afwerking van het kastje gemonteerd. Er is sprake van verschillende modellen, deze verschillen in afmetingen en apparatuur die bij geleverd wordt.	A		Een buizenframes in standaard maatvoering (materiaal?) in standaard maatvoering. In dit frame zijn alle onderdelen voor bewegende delen als ladegeleiding etc. reeds opgenomen. Op het frame wordt ook de afwerking van het kastje gemonteerd. Er is sprake van verschillende modellen, deze verschillen in afmetingen en apparatuur die bij geleverd wordt.	A		1	0	0
6	Is er gereedschap nodig om de keuken in elkaar te zetten? En zo ja, welke?	Ja, de afwerking en alle bewegende delen worden op het frame geschroefd.	PA	Specifieke info over wat voor gereedschap ontbreekt	Ja, de afwerking en alle bewegende delen worden op het frame geschroefd. Boormachine en ander standaard gereedschap	A	In een youtube video is te zien hoe er standaard gereedschap wordt gebruikt, waaronder een boormachine. https://www.youtube.com/watch?v=9U2shM51KHc	1	0	0
7	In welke kleuren is de keuken standaard leverbaar?	x	NA		x	NA		0	0	1
8	In hoeverre is de keuken aanpasbaar na eerste installatie? Biedt het ontwerp van de keuken mogelijkheden voor upgrades en aanpassingen? Zo ja, hoe?	Er wordt gesproken over een Plug&Play systeem. Dit systeem bestaat uit een stalen frame en een ‘Nutsbox’ die verantwoordelijk is voor alle installaties en aansluitingen.	A		Er wordt gesproken over een Plug&Play systeem. Dit systeem bestaat uit een stalen frame en een ‘Nutsbox’ die verantwoordelijk is voor alle installaties en aansluitingen. Daarnaast lijken de lades makkelijk en kastjes makkelijk vervangbaar te zijn door het gebruik van het stalen frame.	A		1	0	0
9	Is de keuken in hoogte verstelbaar? En zo ja, hoe?	x	NA		De lijkt niet in hoogte verstelbaar.	PA		0	1	0
10	Wordt de keuken aan de wand bevestigd, en zo ja, hoe?	Er is geen sprake van een voorzetwand. De keuken is Solitair.	A		De keuken is solitair, en op zichzelf staand.	A		1	0	0
11	Heeft uw keuken een voorzetwand nodig en hoeveel ruimte neemt deze in?	Geen spraken van een voorzetwand.	A		Geen spraken van een voorzetwand.	A		1	0	0
12	Bij toepassing van een voorzetwand, wanneer moet deze aan een (tussen)wand worden bevestigd?	x	NA		x	NA		0	0	1
13	Wat is/zijn de technische levensduur van de gehele keuken en de (losse) elementen?	x	NA		x	NA		0	0	1
14	Wat is/zijn de functionele levensduur van de gehele keuken en de (losse) elementen?	x	NA		x	NA		0	0	1
15	Zijn er strategieën toegepast om ervoor te zorgen dat er minder materiaal wordt gebruikt? Zo ja, welke?	Door het gebruik van een frame is er geen sprake meer van een combinatie van diverse kastjes, waardoor alle overbodige tussenwanden, plinten, etc. ontbreken.	A		Door het gebruik van een frame is er geen sprake meer van een combinatie van diverse kastjes, waardoor alle overbodige tussenwanden, plinten, etc. ontbreken.	A		1	0	0
16	Zijn er strategieën toegepast om ervoor te zorgen dat er minder energie wordt gebruikt? Zo ja, welke?	x	NA		x	NA		0	0	1
17	Zijn er in het strategieën toegepast om verbintenis/hechting tussen de keuken en de gebruiker te vergroten? Zo ja, welke?	x	NA		x	NA		0	0	1
18	Zijn er in het strategieën toegepast om levensduur/duurzaamheid van de keuken te vergroten? Zo ja, welke?	x	NA		x	NA		0	0	1
19	Zijn er in het strategieën toegepast om de keuken en de elementen waaruit deze opgebouwd is te standaardiseren? Zo ja, welke?	x	NA		x	NA		0	0	1
20	Is er bij het ontwerp van de keuken rekening gehouden met gemak van onderhoud en reparaties? Zo ja, hoe?	x	NA		x	NA		0	0	1
21	In hoeverre kunnen aansluitingen van leidingen flexibel worden aangebracht en gedurende de levensduur worden gewijzigd?	x	NA		x	NA		0	0	1
22	Is er in het ontwerp van de keuken rekening gehouden met recycling van de onderdelen/elementen/hele keuken? Zo ja, hoe?	x	NA		x	NA		0	0	1
23	In hoeverre is de keuken de- en re-montabel en hoe werkt dat?	x	NA		x	NA		0	0	1
24	Hebben jullie resultaten van de milieu-impact? Zo ja, hoe zijn deze resultaten berekend/welke methode is te gepast om deze resultaten te berekenen?	x	NA		x	NA		0	0	1
25	Heeft de keuken een dubokeur en/of hebben de toegepaste materialen een FSC- of PEFC-keurmerk en/of een ander keurmerk?	x	NA		x	NA		0	0	1
26	Wordt er bij de keuken ook apparatuur geleverd? Zo ja, welke en is deze ook circulair?(in het geval van nog niet elektrisch koken)	De keuken kan geleverd worden met volledige keuken uitrusting: Inductiekookplaat Afzuigkap Spoelbak met kraan Inbouwkoelkast Inbouwoven Volledig geïntegreerde vaatwasser	PA	Geen info of de apparatuur circulair is.	De keuken kan geleverd worden met volledige keuken uitrusting: Inductiekookplaat Afzuigkap Spoelbak met kraan Inbouwkoelkast Inbouwoven Volledig geïntegreerde vaatwasser Geen info of de apparatuur circulair is.	PA		0	1	0
27	Kan de keuken later worden aangepast aan elektrisch koken? Zo ja, hoe?	x	NA		x	NA		0	0	1
	Industrieel model							0	0	9
1	Met welke partners werken jullie samen?	x	NA		x	NA		0	0	1
2	Welke activiteiten voeren de partners uit?	x	NA		x	NA		0	0	1
3	In welke faciliteiten worden deze activiteiten uitgevoerd? (Winkels, fabrieken, sorteerpunten, etc.)	x	NA		x	NA		0	0	1
4	Welke partners zijn voor welke elementen van de keuken verantwoordelijk?	x	NA		x	NA		0	0	1
5	Hoe vindt toelevering plaats van de toeleverancier naar jullie?	x	NA		x	NA		0	0	1
6	Worden onderdelen buiten NL gemaakt?	x	NA		x	NA		0	0	1
7	Wie zijn de materiaalleveranciers? En wat leveren ze?	x	NA		x	NA		0	0	1
8	Welke afspraken zijn er gemaakt over terugname met de toeleveranciers?	x	NA		x	NA		0	0	1
9	Is er nagedacht over het vervoer van de keuken naar de klant/gebruiker?	x	NA		x	NA		0	0	1
	Business model							0	0	10
1	Wie is er bij gebruik van de keuken eigenaar van de keuken?	x	NA		x	NA		0	0	1
2	Onder welke voorwaarden wordt de keuken geleverd: leasetermijnen, garantie, voorwaarden voor terugname/koop etc.?	x	NA		x	NA		0	0	1
3	Leveren jullie alleen business to business of ook business to costumer?	x	NA		x	NA		0	0	1
4	Leveren jullie aan een specifiek soort klant? (Rijk/arm, particuliere woningverhuurder/corporatie, etc.)	x	NA		x	NA		0	0	1
5	Wat wordt er naast het keukenmeubel nog meer bijgeleverd? (Keukenapparatuur, kranen etc.) En onder welke voorwaarden?	x	NA		x	NA		0	0	1
6	Via welke kanalen verkopen jullie de keuken? (Webshop, telefonisch, winkels etc.)	x	NA		x	NA		0	0	1
7	Via welke kanalen regelen jullie terugnamen?	x	NA		x	NA		0	0	1
8	Wat gebeurt er bij beschadigingen van de keuken?	x	NA		x	NA		0	0	1
9	Wat voor afspraken zijn er gemaakt over het onderhoud van de keuken?	x	NA		x	NA		0	0	1
10	Welke afspraken zijn er gemaakt met toeleveranciers van onderdelen (en eventueel apparatuur) van de keuken over terugname?	x	NA		x	NA		0	0	1
	Afsluitend
1	Zou je nog iets willen veranderen/verbeteren aan de keuken?	x	NA			NA		0	0	1

## Sheet: DKG
		Antwoord (eigen website)	Codering	Opmerkingen	Beschikbaarheid			Antwoord (interview)	Codering	Opmerkingen (bron info)	Beschikbaarheid
	Algemeen				A	PA	NA				A	PA	NA
1	Hoe heet jullie keuken?	x	NA	DKG en Bruynzeel verkondigen op dit moment hun circulaire keuken op de recycle services die ze aanbieden.	0	0	1	De Groene Keuken	A		1	0	0
2	Wat is jullie definitie van circulariteit?	In een circulaire economie stapt DKG af van een economie met afval en het gebruik van nieuwe grondstoffen. Ook wel de lineaire economie van produceren, consumeren en daarna weggooien. In een circulaire economie wordt deze cirkel rond gemaakt. Zo worden grondstoffen en het milieu bespaard, CO2-uitstoot bespaard en innovatie gestimuleerd.	A	Bron: Bruynzeelkeukens.nl	1	0	0	Richtlijnen: tegen uitputting grondstoffen, beperken klimaatverandering.	A		1	0	0
3	Wanneer is de keuken aangekondigd?	Eerste studiemodel is gepresenteerd in 2021op PROVADA.	A		1	0	0	Prototype 1 is 2 jaar geleden gepresenteerd bij het inspiration center. Prototype 2 is gepresenteerd tijdens de Promovada, een vastgoedbeurs in Amsterdam. Momenteel zijn we bezig met prototype 3. De evaluatie per prototype is vooral gericht op innovatie in materiaal. Nu bezig zijn we bezig met prototype 3: Biobased, recyclebaar en ook klaar voor massaproductie.	A		1	0	0
4	Vanaf is de keuken beschikbaar voor afnemers?	x	NA		0	0	1	Hopelijk begin volgend 1 jan 2023. Productielijn opzetten duurt gemiddeld 1 jaar.	A		1	0	0
5	Is de keuken het enige product dat jullie produceren?	Nee	A		1	0	0	Nee	A		1	0	0
6	Zijn er nog ander partners betrokken bij het project? (Woningbouwcorporaties, toeleveranciers, aannemers etc.)	x	NA		0	0	1	Dit soort trajecten kunnen niet zonder stakeholders Alle toeleveranciers zijn benaderd om te kijken wat ze voor DKG konden betekenen in het ontwikkelen van een circulaire keuken. Als dat niet zo was zijn we opzoek gegaan naar nieuwe toeleveranciers. Altijd in communicatie met de stakeholders. Dit keuken traject is nu vooral nog gericht voor de B2B sector, daarin is de relatie tot de klant heel be…	A		1	0	0
	Technisch model				0	0	27				23	0	4
1	Omschrijf jullie circulaire keuken	x	NA		0	0	1	Volledig circulair product. De kern is gemaakt van cellulose vezels. Met warmte en druk is van deze vezels een soort hdf materiaal van geperst. Daar zit een toplaag op van biobased materiaal, gemaakt van papier gedrenkt in bagas(aftreksel van suikerriet) . Het is zo op elkaar geplakt dat het ook weer ‘on-clickt’ kan worden. Voor de panelen geen nieuwe grondstoffen, en het product is volledig recy…	A		1	0	0
2	Met wat voor energie wordt de keuken geproduceerd?	x	NA		0	0	1	DKG is als bedrijf CO2 neutraal en streeft CO2 negatief te zijn. Ook hebben we zo’n 8000 zonnepanelen en een eigen verbrandingsoven. Deze verbrandingsoven wordt gebruikt om productie en oude keukens te verbranden het het productie process weer te voorzien van nieuwe energie en warmte. In het totaal draaien we op 40% eigen energie.	A		1	0	0
3	Welke materialen worden voor de keuken gebruikt? (Biologisch vs. Technische materialen)	x	NA		0	0	1	Biologisch materiaal: De kern is gemaakt van cellulose vezels. Met warmte en druk is van deze vezels een soort hdf materiaal van geperst. Daar zit een toplaag op van biobased materiaal, gemaakt van papier gedrenkt in bagas(aftreksel van suikerriet) . Het is zo op elkaar geplakt dat het ook weer ‘on-clickt’ kan worden.	A		1	0	0
4	Zijn er plannen om deze materialen in de toekomst te wijzigen? Zo ja, welke?	x	NA		0	0	1	Ja, huidige keuken is nog een pilot. Er zijn ideeën maar die zijn nog niet voor de buiten wereld. Het zijn nog hele prille ideeën.	A		1	0	0
5	Uit welke elementen is de keuken opgebouwd?	x	NA		0	0	1	Hetzelfde als de huidige panelen keuken van DKG. Momenteel zijn we ook bezig met onderzoek naar een keuken met een stalen frame. Het belangrijkste vraagstuk daarbij is voornamelijk hoe materiaal gereduceerd kan worden. Het idee is dat er een stalen frame waar alle geleiders en scharnieren op bevestigd worden. Voordelen: Kosten besparend. Modulair, flexibel. Voor de duidelijkheid. Dit interview ga…	A		1	0	0
6	Is er gereedschap nodig om de keuken in elkaar te zetten? En zo ja, welke?	x	NA		0	0	1	Torx schroevendraaier.	A		1	0	0
7	In welke kleuren is de keuken standaard leverbaar?	x	NA		0	0	1	B2B: geen expliciete kleur. Standaardkleuren: licht grijs, wit, lichte kleur hout.	A		1	0	0
8	In hoeverre is de keuken aanpasbaar na eerste installatie? Biedt het ontwerp van de keuken mogelijkheden voor upgrades en aanpassingen? Zo ja, hoe?	x	NA		0	0	1	De keuken is een maatproduct, dus na installatie niet meer aanpasbaar.	A		1	0	0
9	Is de keuken in hoogte verstelbaar? En zo ja, hoe?	x	NA		0	0	1	Hoogte verstelbaar via het plinten systeem (stelpootjes).	A		1	0	0
10	Wordt de keuken aan de wand bevestigd, en zo ja, hoe?	x	NA		0	0	1	Op basis van het huidige constructie systeem. Wandmontage.	A		1	0	0
11	Heeft uw keuken een voorzetwand nodig en hoeveel ruimte neemt deze in?	x	NA		0	0	1	n.v.t.	NA		0	0	1
12	Bij toepassing van een voorzetwand, wanneer moet deze aan een (tussen)wand worden bevestigd?	x	NA		0	0	1	n.v.t.	NA		0	0	1
13	Wat is/zijn de technische levensduur van de gehele keuken en de (losse) elementen?	x	NA		0	0	1	20 en 30 jaar.	A		1	0	0
14	Wat is/zijn de functionele levensduur van de gehele keuken en de (losse) elementen?	x	NA		0	0	1	10 en 15 jaar.	A		1	0	0
15	Zijn er strategieën toegepast om ervoor te zorgen dat er minder materiaal wordt gebruikt? Zo ja, welke?	x	NA		0	0	1	Nee. De panelen zijn wel flink in materiaal gereduceerd. Van solid naar honingraad materiaal. Qua gewicht scheelt dit bijna de helft.	A		1	0	0
16	Zijn er strategieën toegepast om ervoor te zorgen dat er minder energie wordt gebruikt? Zo ja, welke?	x	NA		0	0	1	Dat ligt aan type apparaat. Dit is niet aan DKG maar aan de klant. DKG kan een advies doen, maar de eindbeslissing ligt bij de eindklant.	A		1	0	0
17	Zijn er in het strategieën toegepast om verbintenis/hechting tussen de keuken en de gebruiker te vergroten? Zo ja, welke?	x	NA		0	0	1	QR-code met de levensloop, materiaal waarvan de keuken gemaakt is gemaakt is, waar de keuken vandaan komt. De klant kan dat dan zien.	A		1	0	0
18	Zijn er in het strategieën toegepast om levensduur/duurzaamheid van de keuken te vergroten? Zo ja, welke?	x	NA		0	0	1	Eerder toegelicht.	A		1	0	0
19	Zijn er in het strategieën toegepast om de keuken en de elementen waaruit deze opgebouwd is te standaardiseren? Zo ja, welke?	x	NA		0	0	1	De zaagdelen zijn gestandaardiseerd. Dit is overgenomen uit het huidige assortiment. Net als scharnieren, geleiders en plinten. Dezelfde maten van standaardisatie als huidige productieproces. De moeilijkheidsgraat van innovatieproces bij een groot bedrijf, is het voorkomen van ruis in het productieproces. Innovatie moet passen in het huidige productieproces.	A		1	0	0
20	Is er bij het ontwerp van de keuken rekening gehouden met gemak van onderhoud en reparaties? Zo ja, hoe?	x	NA		0	0	1	Moet voldoen aan de standaard kwaliteitseis van DKG. Circulaire keuken worden het hetzelfde getest als de andere keukens als DKG.	A		1	0	0
21	In hoeverre kunnen aansluitingen van leidingen flexibel worden aangebracht en gedurende de levensduur worden gewijzigd?	x	NA		0	0	1	Altijd is dat het geval want er zit leidingruimte achter (standaard keuken). Zeker bij een gootsteenkast en kookplaatkast want deze is demontabel.	A		1	0	0
22	Is er in het ontwerp van de keuken rekening gehouden met recycling van de onderdelen/elementen/hele keuken? Zo ja, hoe?	x	NA		0	0	1	x	NA		0	0	1
23	In hoeverre is de keuken de- en re-montabel en hoe werkt dat?	x	NA		0	0	1	Losmaakbare verbindingen, torx.	A		1	0	0
24	Hebben jullie resultaten van de milieu-impact? Zo ja, hoe zijn deze resultaten berekend/welke methode is te gepast om deze resultaten te berekenen?	x	NA		0	0	1	Momenteel bezig met het opzetten van duurzaamheidsrapporten (EPD en LCA). In deze rapportage worden naast EPD en LCA ook de bron van energie meegenomen en de locatie van de producent etc.. Nog geen vaste rapportages of standaardisatie want het is nog geen gerapporteerd product uit de prijslijst.	A		1	0	0
25	Heeft de keuken een dubokeur en/of hebben de toegepaste materialen een FSC- of PEFC-keurmerk en/of een ander keurmerk?	x	NA		0	0	1	Daar voldoet het altijd aan bij DKG.	A		1	0	0
26	Wordt er bij de keuken ook apparatuur geleverd? Zo ja, welke en is deze ook circulair?(in het geval van nog niet elektrisch koken)	x	NA		0	0	1	De apparatuur wordt wel meegeleverd, maar wordt niet door DKG geleverd.	A		1	0	0
27	Kan de keuken later worden aangepast aan elektrisch koken? Zo ja, hoe?	x	NA		0	0	1	x	NA		0	0	1
	Industrieel model				1	0	8				7	0	2
1	Met welke partners werken jullie samen?	x	NA		0	0	1	De gehele keten is betrokken: Woningcorporatie Materiaalleverancier Projectontwikkelaar Beleggers Standaard leveranciers (voor standaardisatie onderdelen) Speciale leverancier in Nederland die het plaatmateriaal maakt	A		1	0	0
2	Welke activiteiten voeren de partners uit?	x	NA		0	0	1	Leverancier van het innovatie plaatmateriaal is op eigen initiatief aan het pionieren.	A		1	0	0
3	In welke faciliteiten worden deze activiteiten uitgevoerd? (Winkels, fabrieken, sorteerpunten, etc.)	x	NA		0	0	1	Deze partij heeft een eigen lab en fabriek. In het lab hebben zij de mogelijkheid om testmateriaal te produceren. Wanneer het materiaal getest is komt het naar DKG en testen wij of we er bijvoorbeeld in kunnen schroeven, er constructies in kunnen maken, kunnen we het door de machines heen halen etc..	A		1	0	0
4	Welke partners zijn voor welke elementen van de keuken verantwoordelijk?	x	NA		0	0	1	x	NA		0	0	1
5	Hoe vindt toelevering plaats van de toeleverancier naar jullie?	x	NA		0	0	1	Staat wel op de lijst voor de LCA en milieurapportage, maar momenteel nog niet elektrisch. Er wordt wel met hubs gewerkt, dus dat materiaal verzameld. Dit zorgt dat er niet met lege vrachtwagen wordt gereden.	A		1	0	0
6	Worden onderdelen buiten NL gemaakt?	x	NA		0	0	1	Er worden veel onderdelen buiten NL gemaakt. Bijvoorbeeld geleiders en scharnieren komen uit Oostenrijk. Wel bijna alles binnen Europa.	A		1	0	0
7	Wie zijn de materiaalleveranciers? En wat leveren ze?	x	NA		0	0	1	x	NA		0	0	1
8	Welke afspraken zijn er gemaakt over terugname met de toeleveranciers?	Keukens worden opgehaald	A		1	0	0	Nu nog geen afspraken over. De toplaag kan er af. Het product moet terug naar DKG en dan gaat het terug naar de leverancier. Die intentie is er wel, maar dit is nog in de opstartfase want het proces van keuken ontwikkeling zit nog erg in het begin.	A		1	0	0
9	Is er nagedacht over het vervoer van de keuken naar de klant/gebruiker?	x	NA		0	0	1	De ambitie is om samen te werken met een duurzaam transportbedrijf.	A		1	0	0
	Business model	x			0	0	10				0	0	10
1	Wie is er bij gebruik van de keuken eigenaar van de keuken?	x	NA		0	0	1	Alleen verkoop.	A		1	0	0
2	Onder welke voorwaarden wordt de keuken geleverd: leasetermijnen, garantie, voorwaarden voor terugname/koop etc.?	x	NA		0	0	1	DKG wil wel eigenaar blijven van het product en de keuken terugnemen. Geen leaseconstructie. Terugkoop garantie is nog in ontwikkeling.	A		1	0	0
3	Leveren jullie alleen business to business of ook business to costumer?	x	NA		0	0	1	Er is wel intentie om B2C te leveren. Binnenkort zal in een Bruynzeel winkel een circulaire keuken gepresenteerd worden om te pijlen of er interesse is. Als dit aanslaat kan vanaf januari ook de B2C de keuken afgenomen worden.	A		1	0	0
4	Leveren jullie aan een specifiek soort klant? (Rijk/arm, particuliere woningverhuurder/corporatie, etc.)	x	NA		0	0	1	Meerder producten. Frame keuken is bedoeld voor het high-end segment. De panelenkeuken is bedoeld voor de sociale woningsector.	A		1	0	0
5	Wat wordt er naast het keukenmeubel nog meer bijgeleverd? (Keukenapparatuur, kranen etc.) En onder welke voorwaarden?	x	NA		0	0	1	x	NA		0	0	1
6	Via welke kanalen verkopen jullie de keuken? (Webshop, telefonisch, winkels etc.)	x	NA		0	0	1	Bruynzeel Keller B2B. Bruynzeel: Retail locaties.	A		1	0	0
7	Via welke kanalen regelen jullie terugnamen?	x	NA		0	0	1	De bedoeling is dat de keuken wordt opgehaald. Dit zou gebeuren via de QR-code.	A		1	0	0
8	Wat gebeurt er bij beschadigingen van de keuken?	x	NA		0	0	1	10 jaar garantie: gerepareerd.	A		1	0	0
9	Wat voor afspraken zijn er gemaakt over het onderhoud van de keuken?	x	NA		0	0	1	10 jaar garantie: gerepareerd.	A		1	0	0
10	Welke afspraken zijn er gemaakt met toeleveranciers van onderdelen (en eventueel apparatuur) van de keuken over terugname?		NA		0	0	1	x	NA		0	0	1
	Afsluitend
1	Zou je nog iets willen veranderen/verbeteren aan de keuken?	x	NA		0	0	0	x	NA		0	0	0

## Sheet: NeverEnding Kitchen
		Antwoord (eigen website)	Codering	Opmerkingen	Antwoord ((social) Media)	Codering	Opmerkingen (bron info)	Gecombineerd
	Algemeen							A	PA	NA
1	Hoe heet jullie keuken?	NeverEndingKitchen	A		NeverEnding Kitchen	A	Samenwerking tussen Triboo en Electrolux	1	0	0
2	Wat is jullie definitie van circulariteit?	Voorkomen van het verlies van grondstoffen. Wat geproduceerd wordt is in harmonie tussen mens en natuur, dit wordt gedaan door verantwoordelijkheid te nemen. Triboo zet revolutionaire innovaties in beweging om maximale impact te maken. Ze hebben de doelstelling om waardeloos afval om te zetten in gezonde en circulaire producten.	A		Voorkomen van het verlies van grondstoffen. Wat geproduceerd wordt is in harmonie tussen mens en natuur, dit wordt gedaan door verantwoordelijkheid te nemen. Triboo zet revolutionaire innovaties in beweging om maximale impact te maken. Ze hebben de doelstelling om waardeloos afval om te zetten in gezonde en circulaire producten.	A		1	0	0
3	Wanneer is de keuken aangekondigd?	x	NA		2019	A	Bron: vimeo, triboo. https://vimeo.com/490336107	1	0	0
4	Vanaf is de keuken beschikbaar voor afnemers?	x	NA		2021	A	Bron: vimeo, triboo. https://vimeo.com/490336108	1	0	0
5	Is de keuken het enige product dat jullie produceren?	x	NA		Triboo produceert ook nog andere circulaire producten: Circulaire werkplek, bureaustoel, circulaire tafels, verlichting, plantenbakken en afvalscheiding.	A		1	0	0
6	Zijn er nog ander partners betrokken bij het project? (Woningbouwcorporaties, toeleveranciers, aannemers etc.)	x	NA		Samewerking tussen Triboo, Electrolux, Niaga	A		1	0	0
	Technisch model							4	6	17
1	Omschrijf jullie circulaire keuken	x	NA		Panelen keuken van biobased, recyclebaar materiaal.	PA	Geinterpreteerd. Bron: vimeo, triboo. https://vimeo.com/490336107	0	1	0
2	Met wat voor energie wordt de keuken geproduceerd?	x	NA		x	NA		0	0	1
3	Welke materialen worden voor de keuken gebruikt? (Biologisch vs. Technische materialen)	Plaatmateriaal van Niaga Platen: Samengeperst cellulose Pulp, platen worden verbonden door een ‘click-on-unclick’ adhesive. Vervolgens kunnen de platen gelamineerd worden. De platen zijn zo samengesteld dat de verschillende materialen ook weer gescheiden kunnen worden en vervolgens weer op hoogwaardige manier worden hergebruikt.	A		Plaatmateriaal van Niaga Platen: Samengeperst cellulose Pulp, platen worden verbonden door een ‘click-on-unclick’ adhesive. Vervolgens kunnen de platen gelamineerd worden. De platen zijn zo samengesteld dat de verschillende materialen ook weer gescheiden kunnen worden en vervolgens weer op hoogwaardige manier worden hergebruikt.	A		1	0	0
4	Zijn er plannen om deze materialen in de toekomst te wijzigen? Zo ja, welke?	x	NA		x	NA		0	0	1
5	Uit welke elementen is de keuken opgebouwd?	Bestaand uit een voorzet want en vervolgens kunnen de keuken modules daar tegenaan geplaatst worden. Dit verschilt per keuken. De Never Ending Kitchen kent drie modelen De Corporatie Keuken (sociale huur): Deze keuken is volledig remontabel De project keuken: Bestaand uit een voorzet want en vervolgens kunnen de keuken modules daar tegenaan geplaatst worden. Boven- en onderkastjes. Pantry: Bestaa…	A		Duidelijk antwoord op website. Vimeo video laat zien hoe de keuken gemonteerd wordt.	A		1	0	0
6	Is er gereedschap nodig om de keuken in elkaar te zetten? En zo ja, welke?	x	NA		De video lijkt erop te wijzen dat er standaard gereedschap nodig is om de keuken elkaar te zetten.	PA	Bron: vimeo, triboo. https://vimeo.com/490336107	0	1	0
7	In welke kleuren is de keuken standaard leverbaar?	x	NA		x	NA		0	0	1
8	In hoeverre is de keuken aanpasbaar na eerste installatie? Biedt het ontwerp van de keuken mogelijkheden voor upgrades en aanpassingen? Zo ja, hoe?	Er is sprake bij zowel de project keuken als de pantry sprake van een Plug&Play systeem. Dit betekent dat de verschillende modules op volgorde en selectie naar keuze op de voorzetwand gezet kunnen worden.	A		x	NA		1	0	0
9	Is de keuken in hoogte verstelbaar? En zo ja, hoe?	Zowel de projectkeuken als de pantry is in hoogte verstelbaar. Tijdens montage kan gekozen worden voor een specifieke hoogte. Dit kan in de toekomst nog aangepast worden door een monteur.	PA	specificatie over de hoogte mist.	x	NA		0	1	0
10	Wordt de keuken aan de wand bevestigd, en zo ja, hoe?	x	NA		x	NA		0	0	1
11	Heeft uw keuken een voorzetwand nodig en hoeveel ruimte neemt deze in?	Er is sprake van een voorzetwand.	PA	Dimensies missen	Er is sprake van een voorzetwand (dimensies ontbreken)	PA		0	1	0
12	Bij toepassing van een voorzetwand, wanneer moet deze aan een (tussen)wand worden bevestigd?	x	NA		x	NA		0	0	1
13	Wat is/zijn de technische levensduur van de gehele keuken en de (losse) elementen?	x	NA		x	NA		0	0	1
14	Wat is/zijn de functionele levensduur van de gehele keuken en de (losse) elementen?	x	NA		x	NA		0	0	1
15	Zijn er strategieën toegepast om ervoor te zorgen dat er minder materiaal wordt gebruikt? Zo ja, welke?	x	NA		x	NA		0	0	1
16	Zijn er strategieën toegepast om ervoor te zorgen dat er minder energie wordt gebruikt? Zo ja, welke?	x	NA		x	NA		0	0	1
17	Zijn er in het strategieën toegepast om verbintenis/hechting tussen de keuken en de gebruiker te vergroten? Zo ja, welke?	x	NA		Er is sprake van een Niaga tag. Dit is een QR-code die verwijst naar en materialen paspoort, deze geeft onder andere inzicht over uit welke materialen de keuken bestaat en hoe deze terug moeten na gebruik.	A		1	0	0
18	Zijn er in het strategieën toegepast om levensduur/duurzaamheid van de keuken te vergroten? Zo ja, welke?	x	NA		x	NA		0	0	1
19	Zijn er in het strategieën toegepast om de keuken en de elementen waaruit deze opgebouwd is te standaardiseren? Zo ja, welke?	x	NA		x	NA		0	0	1
20	Is er bij het ontwerp van de keuken rekening gehouden met gemak van onderhoud en reparaties? Zo ja, hoe?	x	NA		x	NA		0	0	1
21	In hoeverre kunnen aansluitingen van leidingen flexibel worden aangebracht en gedurende de levensduur worden gewijzigd?	Het Plug&Play principe van de projectkeuken en de pantry biedt mogelijkheden tot aanpassingen en upgrades.	PA	Verdere uitleg over de beschikbare kleuren, modules, etc. ontbreekt.	De video doet vermoeden dat er sprake is van een nuts-box waarin het leidingwerk en de elektriciteit is verwerkt.	PA	Bron: vimeo, triboo. https://vimeo.com/490336107	0	1	0
22	Is er in het ontwerp van de keuken rekening gehouden met recycling van de onderdelen/elementen/hele keuken? Zo ja, hoe?	x	NA		x	NA		0	0	1
23	In hoeverre is de keuken de- en re-montabel en hoe werkt dat?	De corporatiekeuken is volledig re-montabel.	PA	Er wordt geen uitspraakgedaan over de projectkeuken of de pantry.	x	NA		0	1	0
24	Hebben jullie resultaten van de milieu-impact? Zo ja, hoe zijn deze resultaten berekend/welke methode is te gepast om deze resultaten te berekenen?	x	NA		x	NA		0	0	1
25	Heeft de keuken een dubokeur en/of hebben de toegepaste materialen een FSC- of PEFC-keurmerk en/of een ander keurmerk?	x	NA		x	NA		0	0	1
26	Wordt er bij de keuken ook apparatuur geleverd? Zo ja, welke en is deze ook circulair?(in het geval van nog niet elektrisch koken)	x	NA		x	NA		0	0	1
27	Kan de keuken later worden aangepast aan elektrisch koken? Zo ja, hoe?	x	NA		x	NA		0	0	1
	Industrieel model				x			0	0	9
1	Met welke partners werken jullie samen?	x	NA		x	NA		0	0	1
2	Welke activiteiten voeren de partners uit?	x	NA		x	NA		0	0	1
3	In welke faciliteiten worden deze activiteiten uitgevoerd? (Winkels, fabrieken, sorteerpunten, etc.)	x	NA		x	NA		0	0	1
4	Welke partners zijn voor welke elementen van de keuken verantwoordelijk?	x	NA		x	NA		0	0	1
5	Hoe vindt toelevering plaats van de toeleverancier naar jullie?	x	NA		x	NA		0	0	1
6	Worden onderdelen buiten NL gemaakt?	x	NA		x	NA		0	0	1
7	Wie zijn de materiaalleveranciers? En wat leveren ze?	x	NA		x	NA		0	0	1
8	Welke afspraken zijn er gemaakt over terugname met de toeleveranciers?	x	NA		x	NA		0	0	1
9	Is er nagedacht over het vervoer van de keuken naar de klant/gebruiker?	x	NA		x	NA		0	0	1
	Business model							0	0	10
1	Wie is er bij gebruik van de keuken eigenaar van de keuken?	x	NA		x	NA		0	0	1
2	Onder welke voorwaarden wordt de keuken geleverd: leasetermijnen, garantie, voorwaarden voor terugname/koop etc.?	x	NA		x	NA		0	0	1
3	Leveren jullie alleen business to business of ook business to costumer?	x	NA		x	NA		0	0	1
4	Leveren jullie aan een specifiek soort klant? (Rijk/arm, particuliere woningverhuurder/corporatie, etc.)	x	NA		x	NA		0	0	1
5	Wat wordt er naast het keukenmeubel nog meer bijgeleverd? (Keukenapparatuur, kranen etc.) En onder welke voorwaarden?	x	NA		x	NA		0	0	1
6	Via welke kanalen verkopen jullie de keuken? (Webshop, telefonisch, winkels etc.)	x	NA		x	NA		0	0	1
7	Via welke kanalen regelen jullie terugnamen?	x	NA		x	NA		0	0	1
8	Wat gebeurt er bij beschadigingen van de keuken?	x	NA		x	NA		0	0	1
9	Wat voor afspraken zijn er gemaakt over het onderhoud van de keuken?	x	NA		x	NA		0	0	1
10	Welke afspraken zijn er gemaakt met toeleveranciers van onderdelen (en eventueel apparatuur) van de keuken over terugname?	x	NA		x	NA		0	0	1
	Afsluitend
1	Zou je nog iets willen veranderen/verbeteren aan de keuken?	x						0	0	0

## Sheet: NoWa Kitchen
		Antwoord (eigen website)	Codering	Opmerkingen	Antwoord ((social) Media)	Codering	Opmerkingen (bron info)	Gecombineerd
	Algemeen							A	PA	NA
1	Hoe heet jullie keuken?	NoWA Kitchen	A		NoWa Kitchen	A		1	0	0
2	Wat is jullie definitie van circulariteit?	x	NA		The New Makers (TNM) ontwerpt Circulaire Digitaal Configureerbare Houten Woningen en integreert dit met de Engineering + CNC-productie van bijbehoherende gebouwcomponenten, waardoor samen met Partners Betaalbare + Schaalbare Impact mogelijk wordt. Principes NoWa Kitchen - Volledig opgebouwd uit biobased materialen -Geheel remontabel en kan gemakkelijk/ oneindig in & uit elkaar -Plug&Play installa…	A	Definitie circulariteit terug te vinden op de algemene website van The New Makers (TNM) https://thenewmakers.com/mission/	1	0	0
3	Wanneer is de keuken aangekondigd?	x	NA		Rond 2018	PA	Geen exacte datum te vinden, jaar is afgeleid van publicaties en andere media.	0	1	0
4	Vanaf is de keuken beschikbaar voor afnemers?	x	NA		Rond 2018	PA		0	1	0
5	Is de keuken het enige product dat jullie produceren?	x	NA		Woningen, interieur en meubelen	A		1	0	0
6	Zijn er nog ander partners betrokken bij het project? (Woningbouwcorporaties, toeleveranciers, aannemers etc.)	x	NA		Lister Buildings, Wam en van Duren, TBI, Liffin	PA	Antwoord afkomstig van de algemene website. Geen specifiek antwoord over de NoWa Ktichen	0	1	0
	Technisch model							11	5	11
1	Omschrijf jullie circulaire keuken	x	NA		a. Volledig opgebouwd uit biobased materialen b. Geheel remontabel en kan gemakkelijk/oneindig in & uit elkaar c. Plug & Play installaties zorgen voor een snelle en efficiënte installatie d. Ieder onderdeel kan eenvoudig vervangen of aangepast worden e. Lokale productie en flatpack vervoer besparen CO2 f. No Waste: alle onderdelen kunnen worden hergebruikt, gereviseerd of gerecycled	A		1	0	0
2	Met wat voor energie wordt de keuken geproduceerd?	x	NA		x	NA		0	0	1
3	Welke materialen worden voor de keuken gebruikt? (Biologisch vs. Technische materialen)	Biologisch materiaal Volledig opgebouwd uit biobased materialen Verdere informatie over de exacte materialen ontbreekt	PA	Geen informatie over de exacte materialen	Biobased materialen. De focus ligt op het vinden van gerecyclede en gifvrije materialen. Een van de basismaterialen waarmee gewerkt wordt is ECOboard, geperst uit landbouwoverschotten en als grondstof steeds opnieuw te verwerken tot een nieuwe plaat. Daarnaast is er sprake van een materialen paspoort. Dit zorgt ervoor dat de materialen goed te tracen zijn en er	A	Stedebouw&architectuur	1	0	0
4	Zijn er plannen om deze materialen in de toekomst te wijzigen? Zo ja, welke?	x	NA		x	NA		0	0	1
5	Uit welke elementen is de keuken opgebouwd?	De keuken bestaat uit een voorzet wand en verschillende modules die vervolgens tegen de voorwand kunnen worden gemonteerd. Er is sprake van 3 verschillende onder modules en een hang module.	PA		De keuken bestaat uit een voorzetwand en verschillende modules die vervolgens tegen de voorwand kunnen worden gemonteerd. Er is sprake van 3 verschillende onder modules en een hang module. De voorzetwand is modulair en biedt de mogelijkheid om het leidingwerk te verwerken en op een eenvoudige plug-and-play manier te verbinden aan de keuken.	A		1	0	0
6	Is er gereedschap nodig om de keuken in elkaar te zetten? En zo ja, welke?	x	NA		Zonder gereedschap, enkel een inbussleutel. Gebaseerd op de Comfort Cabin	A	Gebaseerd op de comfort cabin. Bron:Bron: https://thenewmakers.com/product/comfort-cabin/	1	0	0
7	In welke kleuren is de keuken standaard leverbaar?	Fronten: White Concrete Dark/antraciet Natural Leather Wood Blad: White Concrete Black Dapple Wood Spat wand White	A		Fronten: White Concrete Dark/antraciet Natural Leather Wood Blad: White Concrete Black Dapple Wood Spat wand White	A		1	0	0
8	In hoeverre is de keuken aanpasbaar na eerste installatie? Biedt het ontwerp van de keuken mogelijkheden voor upgrades en aanpassingen? Zo ja, hoe?	Er is sprake van Plug&Play installaties. Daarnaast kan er een samenstelling gemaakt worden van de verschillende modules naar keuze.	PA		De kastjes zijn modulair en oneindig remontabel dit zorgt ervoor dat de panelen verwisseld kunnen worden en de kleur van de keuken, naar wens aangepast kan worden.	A	Renovatie totaal	1	0	0
9	Is de keuken in hoogte verstelbaar? En zo ja, hoe?	x	NA		In hoogte verstelbaar	PA	Onduidelijk, antwoord nu gebaseerd op foto's van social media TNM.	0	1	0
10	Wordt de keuken aan de wand bevestigd, en zo ja, hoe?	Er is sprake van een voorzetwand (dimensies ontbreken)	PA	Dimensies van de achterwand ontbreken	Ja, specifieke info over hoe ontbreekt.	PA	Gebaseerd of foto's van social media TNM. Specifieke info over hoe ontbreekt	0	1	0
11	Heeft uw keuken een voorzetwand nodig en hoeveel ruimte neemt deze in?	x	NA		Geschat van foto’s: 10-15cm	PA	Gebaseerd of foto's van social media TNM.	0	1	0
12	Bij toepassing van een voorzetwand, wanneer moet deze aan een (tussen)wand worden bevestigd?	x	NA		x	NA		0	0	1
13	Wat is/zijn de technische levensduur van de gehele keuken en de (losse) elementen?	x	NA		x	NA		0	0	1
14	Wat is/zijn de functionele levensduur van de gehele keuken en de (losse) elementen?	x	NA		x	NA		0	0	1
15	Zijn er strategieën toegepast om ervoor te zorgen dat er minder materiaal wordt gebruikt? Zo ja, welke?	x	NA		Geïnterpreteerd van het van het interview Stedebouw en Architectuur: Digitalisering van het productieproces zorgt voor minder productie afval. Daarnaast is het keukenblad hol	A	Stedebouw&Architectuur en Renovatie Totaal	1	0	0
16	Zijn er strategieën toegepast om ervoor te zorgen dat er minder energie wordt gebruikt? Zo ja, welke?	x	NA		x	NA		0	0	1
17	Zijn er in het strategieën toegepast om verbintenis/hechting tussen de keuken en de gebruiker te vergroten? Zo ja, welke?	x	NA		x	NA		0	0	1
18	Zijn er in het strategieën toegepast om levensduur/duurzaamheid van de keuken te vergroten? Zo ja, welke?	Ieder onderdeel kan eenvoudig vervangen of aangepast worden. Verder informatie ontbreekt.	PA	Info over hoe ontbreekt.	x	NA		0	1	0
19	Zijn er in het strategieën toegepast om de keuken en de elementen waaruit deze opgebouwd is te standaardiseren? Zo ja, welke?	Ieder onderdeel kan eenvoudig vervangen of aangepast worden. Verdere informatie ontbreekt.	PA	Info over hoe ontbreekt.	x	NA		0	1	0
20	Is er bij het ontwerp van de keuken rekening gehouden met gemak van onderhoud en reparaties? Zo ja, hoe?	Alle onderdelen kunnen worden hergebruikt, gereviseerd of gerecycled worden. Verdere informatie ontbreekt.	PA		Volledig modulair en oneindig remontabel tot en met de fronten. Dit zorgt ervoor dat elk los onderdeel makkelijk te vervangen is. Daarnaast is er sprake van prefab onderdelen dat het remonteren van de keuken heel gemakkelijk maakt en vrijwel zonder gereedschap kan. Denk aan een Ikea bouwpakket.	A	Gebaseerd op So You Think You can Build.https://www.youtube.com/watch?v=5fRgFxAeSYk&t=3773s	1	0	0
21	In hoeverre kunnen aansluitingen van leidingen flexibel worden aangebracht en gedurende de levensduur worden gewijzigd?	Geheel remontabel en kan gemakkelijk/oneindig in & uitelkaar.	PA	Info over hoe ontbreekt.	Voor het leidingwerk is sprake van een plug & play systeem. Dit systeem zorgt voor flexibiliteit in het leidingwerk en voor makkelijke installatie.	A	Gebaseerd of foto's van social media TNM.	1	0	0
22	Is er in het ontwerp van de keuken rekening gehouden met recycling van de onderdelen/elementen/hele keuken? Zo ja, hoe?	x	NA		De recyclebaarheid van de keuken zit in zowel het modulaire ontwerp en de materiaalkeuze. Bij het kiezen van het materiaal is gekozen voor biobased materialen van rest stromen. Hierbij ligt de focus op hoe het circulaire karakter van het materiaal (het ontbreken van giftige stoffen). Daarnaast wordt ook gekeken naar de levensduur van het materiaal.	A		1	0	0
23	In hoeverre is de keuken de- en re-montabel en hoe werkt dat?	x	NA		De keuken volledig en eindeloos de- en re-montabel. De losmaakbaarheid van de keuken is optimaal door het gebruik van een twee-assige computergestuurde (CNC) vreesmachine. Het gebruik van deze digitale manier van productie zorgt voor een hoge precieze waarin componenten perfect op elkaar aansluiten.	A	Renovatie Totaal, Stedebouw en Architectuur	1	0	0
24	Hebben jullie resultaten van de milieu-impact? Zo ja, hoe zijn deze resultaten berekend/welke methode is te gepast om deze resultaten te berekenen?	x	NA		x	NA		0	0	1
25	Heeft de keuken een dubokeur en/of hebben de toegepaste materialen een FSC- of PEFC-keurmerk en/of een ander keurmerk?	x	NA		x	NA		0	0	1
26	Wordt er bij de keuken ook apparatuur geleverd? Zo ja, welke en is deze ook circulair?(in het geval van nog niet elektrisch koken)	x	NA		x	NA		0	0	1
27	Kan de keuken later worden aangepast aan elektrisch koken? Zo ja, hoe?	x	NA		x	NA		0	0	1
	Industrieel model							0	2	7
1	Met welke partners werken jullie samen?	x	NA		x	NA		0	0	1
2	Welke activiteiten voeren de partners uit?	x	NA		x	NA		0	0	1
3	In welke faciliteiten worden deze activiteiten uitgevoerd? (Winkels, fabrieken, sorteerpunten, etc.)	x	NA		x	NA		0	0	1
4	Welke partners zijn voor welke elementen van de keuken verantwoordelijk?	x	NA		x	NA		0	0	1
5	Hoe vindt toelevering plaats van de toeleverancier naar jullie?	Er is sprake van flatpack transport. Verdere info ontbreekt	PA		Flatpack	PA	Gebaseerd op website TNM, social media	0	1	0
6	Worden onderdelen buiten NL gemaakt?	Er is sprake van lokale productie.	PA		Lokale productie	PA	Gebaseerd op website TNM	0	1	0
7	Wie zijn de materiaalleveranciers? En wat leveren ze?	x	NA		x	NA		0	0	1
8	Welke afspraken zijn er gemaakt over terugname met de toeleveranciers?	x	NA		x	NA		0	0	1
9	Is er nagedacht over het vervoer van de keuken naar de klant/gebruiker?	x	NA		x	NA		0	0	1
	Business model							0	3	7
1	Wie is er bij gebruik van de keuken eigenaar van de keuken?	x	NA		Geïnterpreteerd van wat te zien en te lezen is in interviews en op de social mediakanalen van TNM: De circulaire keuken wordt voornamelijk geleverd op projectbasis. Dit betekend dat de klant volledig eigenaar wordt van de keuken.	PA	Geïnterpreteerd van wat te zien en te lezen is in interviews en op de social mediakanalen van TNM	0	1	0
2	Onder welke voorwaarden wordt de keuken geleverd: leasetermijnen, garantie, voorwaarden voor terugname/koop etc.?	x	NA		x	NA		0	0	1
3	Leveren jullie alleen business to business of ook business to costumer?	x	NA		x	NA		0	0	1
4	Leveren jullie aan een specifiek soort klant? (Rijk/arm, particuliere woningverhuurder/corporatie, etc.)	x	NA		x	NA		0	0	1
5	Wat wordt er naast het keukenmeubel nog meer bijgeleverd? (Keukenapparatuur, kranen etc.) En onder welke voorwaarden?	x	NA		x	PA	Architectuur&Stedenbouw	0	1	0
6	Via welke kanalen verkopen jullie de keuken? (Webshop, telefonisch, winkels etc.)	x	NA		Er is sprake van een online configuarator. Hiermee kunnen klanten zelf hun keuken samenstellen aan de hand van een catalogus. Tijdens het configureren is ook gelijk te zien wat de milieukosten zijn.	NA		0	0	1
7	Via welke kanalen regelen jullie terugnamen?	x	NA		x	NA		0	0	1
8	Wat gebeurt er bij beschadigingen van de keuken?	x	NA		x	PA		0	1	0
9	Wat voor afspraken zijn er gemaakt over het onderhoud van de keuken?	x	NA		De website van The New Makers doet vermoeden dat er partners zijn ingeschakeld voor het onderhoud van hun projecten.	NA		0	0	1
10	Welke afspraken zijn er gemaakt met toeleveranciers van onderdelen (en eventueel apparatuur) van de keuken over terugname?	x	NA		x	NA		0	0	1
	Afsluitend
1	Zou je nog iets willen veranderen/verbeteren aan de keuken?	x	NA		x	NA		0	0	1

## Sheet: CIK
		Antwoord (eigen website)	Codering	Opmerkingen	Antwoord ((social) Media)	Codering	Opmerkingen (bron info)	Gecombineerd
	Algemeen							A	PA	NA
1	Hoe heet jullie keuken?	De Circulaire Keuken	A					1	0	0
2	Wat is jullie definitie van circulariteit?	In de circulaire economie worden grondstoffen op een zo hoog mogelijk kwaliteitsniveau hergebruikt.	A					1	0	0
3	Wanneer is de keuken aangekondigd?	2017	NA					0	0	1
4	Vanaf is de keuken beschikbaar voor afnemers?	2022	A					1	0	0
5	Is de keuken het enige product dat jullie produceren?	Nee	NA					0	0	1
6	Zijn er nog ander partners betrokken bij het project? (Woningbouwcorporaties, toeleveranciers, aannemers etc.)	Ja	A					1	0	0
	Technisch model							20	0	7
1	Omschrijf jullie circulaire keuken	Plug and play concept dat de keuken onderverdeeld op basis van technische en functionele levensduur. Docking station waar modules makkelijk aan vast, en van los gekoppeld kunnen worden	A					1	0	0
2	Met wat voor energie wordt de keuken geproduceerd?	x	NA					0	0	1
3	Welke materialen worden voor de keuken gebruikt? (Biologisch vs. Technische materialen)	Zo bouwen we nu prototypes van houtproducten met een lange levensduur. Waar nodig brengen we een afwerklaag aan om de levensduur nog verder te verlengen.	A					1	0	0
4	Zijn er plannen om deze materialen in de toekomst te wijzigen? Zo ja, welke?	Het project jaagt steeds nieuwe samenwerkingen aan tussen partijen die innoveren op materiaalgebied, om zo tot een optimale materiaalkeuze te komen.	A					1	0	0
5	Uit welke elementen is de keuken opgebouwd?	Docking station en keukenmodules, modules opgebouwd uit frame, invulling en afwerking	A					1	0	0
6	Is er gereedschap nodig om de keuken in elkaar te zetten? En zo ja, welke?	Nee	A					1	0	0
7	In welke kleuren is de keuken standaard leverbaar?	Wit	A					1	0	0
8	In hoeverre is de keuken aanpasbaar na eerste installatie? Biedt het ontwerp van de keuken mogelijkheden voor upgrades en aanpassingen? Zo ja, hoe?	Volledig aanpasbaar, en volledig uit te breiden	A					1	0	0
9	Is de keuken in hoogte verstelbaar? En zo ja, hoe?	Ja, via het docking station, en het vervangen van de voetstukken	A					1	0	0
10	Wordt de keuken aan de wand bevestigd, en zo ja, hoe?	Ja, via het docking station	A					1	0	0
11	Heeft uw keuken een voorzetwand nodig en hoeveel ruimte neemt deze in?	Ja, onbekend	A					1	0	0
12	Bij toepassing van een voorzetwand, wanneer moet deze aan een (tussen)wand worden bevestigd?	x	NA					0	0	1
13	Wat is/zijn de technische levensduur van de gehele keuken en de (losse) elementen?	40, 40, 80 jaar	A					1	0	0
14	Wat is/zijn de functionele levensduur van de gehele keuken en de (losse) elementen?	20, 40, 80 jaar	A					1	0	0
15	Zijn er strategieën toegepast om ervoor te zorgen dat er minder materiaal wordt gebruikt? Zo ja, welke?	-	NA					0	0	1
16	Zijn er strategieën toegepast om ervoor te zorgen dat er minder energie wordt gebruikt? Zo ja, welke?	-	NA					0	0	1
17	Zijn er in het strategieën toegepast om verbintenis/hechting tussen de keuken en de gebruiker te vergroten? Zo ja, welke?	ja, aanpasbaar aan de eisen van de gebruiker	A					1	0	0
18	Zijn er in het strategieën toegepast om levensduur/duurzaamheid van de keuken te vergroten? Zo ja, welke?	ja, hergebruik losse onderdelen voor het langer gebruiken van het geheel	A					1	0	0
19	Zijn er in het strategieën toegepast om de keuken en de elementen waaruit deze opgebouwd is te standaardiseren? Zo ja, welke?	ja, volledig gestandaardiseerd	A					1	0	0
20	Is er bij het ontwerp van de keuken rekening gehouden met gemak van onderhoud en reparaties? Zo ja, hoe?	Ja, alles losmaakbaar zonder gereedschap	A					1	0	0
21	In hoeverre kunnen aansluitingen van leidingen flexibel worden aangebracht en gedurende de levensduur worden gewijzigd?	-	NA					0	0	1
22	Is er in het ontwerp van de keuken rekening gehouden met recycling van de onderdelen/elementen/hele keuken? Zo ja, hoe?	ja, uiteindelijk wordt materiaal gerecycled	A					1	0	0
23	In hoeverre is de keuken de- en re-montabel en hoe werkt dat?	volledig, via klikverbindingen	A					1	0	0
24	Hebben jullie resultaten van de milieu-impact? Zo ja, hoe zijn deze resultaten berekend/welke methode is te gepast om deze resultaten te berekenen?	ja, via CE-LCA	A					1	0	0
25	Heeft de keuken een dubokeur en/of hebben de toegepaste materialen een FSC- of PEFC-keurmerk en/of een ander keurmerk?	-	NA					0	0	1
26	Wordt er bij de keuken ook apparatuur geleverd? Zo ja, welke en is deze ook circulair?(in het geval van nog niet elektrisch koken)	Mogelijk	A					1	0	0
27	Kan de keuken later worden aangepast aan elektrisch koken? Zo ja, hoe?	-	NA					0	0	1
	Industrieel model							5	0	4
1	Met welke partners werken jullie samen?	Eigen Haard, Woonbedrijf, Ymere, Portaal, Waterweg Wonen, AMS, TU Delft Bouwkunde, Climate KIC, Chalmers, Syntrus Achmea Real Estate, Vedum, Dirkzwager Groep, Topline, HSB	A					1	0	0
2	Welke activiteiten voeren de partners uit?	Samen ontwikkeld	A					1	0	0
3	In welke faciliteiten worden deze activiteiten uitgevoerd? (Winkels, fabrieken, sorteerpunten, etc.)	Returnstreet, returnfabriek,	A					1	0	0
4	Welke partners zijn voor welke elementen van de keuken verantwoordelijk?	Fabrikant voor alles	A					1	0	0
5	Hoe vindt toelevering plaats van de toeleverancier naar jullie?	-	NA					0	0	1
6	Worden onderdelen buiten NL gemaakt?	-	NA					0	0	1
7	Wie zijn de materiaalleveranciers? En wat leveren ze?	Topline, werkbladen	A					1	0	0
8	Welke afspraken zijn er gemaakt over terugname met de toeleveranciers?	-	NA					0	0	1
9	Is er nagedacht over het vervoer van de keuken naar de klant/gebruiker?	-	NA					0	0	1
	Business model							7	0	3
1	Wie is er bij gebruik van de keuken eigenaar van de keuken?	Verhuurder	A					1	0	0
2	Onder welke voorwaarden wordt de keuken geleverd: leasetermijnen, garantie, voorwaarden voor terugname/koop etc.?	Verkoop met onderhoudsabonnement en terugnamegarantie	A					1	0	0
3	Leveren jullie alleen business to business of ook business to costumer?	Beide	A					1	0	0
4	Leveren jullie aan een specifiek soort klant? (Rijk/arm, particuliere woningverhuurder/corporatie, etc.)	Voornamelijk woningcorporaties	A					1	0	0
5	Wat wordt er naast het keukenmeubel nog meer bijgeleverd? (Keukenapparatuur, kranen etc.) En onder welke voorwaarden?	apparatuur kan meegeleverd worden van ATAG, die zelf ciruclaire apparatuur maakt	A					1	0	0
6	Via welke kanalen verkopen jullie de keuken? (Webshop, telefonisch, winkels etc.)	-	NA					0	0	1
7	Via welke kanalen regelen jullie terugnamen?	-	NA					0	0	1
8	Wat gebeurt er bij beschadigingen van de keuken?	Niet geheel vervangen, soms ook mogelijk voor de gebruiker om zelf een reparatie uit te voeren	A					1	0	0
9	Wat voor afspraken zijn er gemaakt over het onderhoud van de keuken?	onderhoudsabonnement	A					1	0	0
10	Welke afspraken zijn er gemaakt met toeleveranciers van onderdelen (en eventueel apparatuur) van de keuken over terugname?	-	NA					0	0	1
	Afsluitend
1	Zou je nog iets willen veranderen/verbeteren aan de keuken?							0	0	0
